# Supplementary material
Source: publisher figshare collection journal article supplement (https://tandf.figshare.com/articles/dataset/_/5441644)
Supplement: Supplementary file 1 [file 9409171]

## SUPPLEMENTARY MATERIAL

### **Curvulin and spirostaphylotrichins R and U from extracts produced by two endophytic *Bipolaris* sp. associated to aquatic macrophytes with antileishmanial activity**

Tiago Tognolli de Almeida<sup>1,2</sup>; Marcos Alessandro dos Santos Ribeiro<sup>1,3</sup>; Julio Cesar Polonio<sup>1</sup>; Francielle Pelegrin Garcia<sup>4</sup>; Celso Vataru Nakamura<sup>4</sup>; Eduardo Cesar Meurer<sup>5</sup>; Maria Helena Sarragiotto<sup>3</sup>; Débora Cristina Baldoqui<sup>3</sup>; João Lúcio Azevedo<sup>6</sup> and João Alencar Pamphile<sup>1\*</sup>

<sup>1</sup> *Departamento de Biotecnologia, Genética e Biologia Celular, Universidade Estadual de Maringá, Maringá, PR, Brazil*

<sup>2</sup> *Centro de Energia Nuclear na Agricultura (CENA), Universidade de São Paulo (USP), Piracicaba, SP, Brazil*

<sup>3</sup> *Departamento de Química, Universidade Estadual de Maringá, Maringá, PR, Brazil*

<sup>4</sup> *Programa de Pós-graduação em Ciências Biológicas, Laboratório de Inovação Tecnológica no Desenvolvimento de Fármacos e Cosméticos, Universidade Estadual de Maringá, Maringá, PR, Brazil*

<sup>5</sup> *Fenn Mass Spectrometry Laboratory, Universidade Federal do Paraná, Jandaia do Sul, PR, Brazil*

<sup>6</sup> *Departamento de Genética, Escola Superior de Agricultura "Luiz de Queiroz", Universidade de São Paulo, Piracicaba, SP, Brazil*

*\*Corresponding author:*

*João Alencar Pamphile*

*Department of Biotechnology, Genetics and Cell Biology, State University of Maringá, Av. Colombo, 5790, Jardim Universitário, 87020-900, Maringá, Paraná, Brazil*

*Tel: +44-3011-4342*

*e-mail: [prof.pamphile@gmail.com](mailto:prof.pamphile@gmail.com)*

**Abstract:** In the present study biological activity and chemical composition of two crude extracts of endophytic fungal strains of *Bipolaris* genera isolated from two species of aquatic macrophytes: *Eichhornia azurea* (Kunth) and *E. crassipes* (Mart.) were investigated. The nuclear magnetic resonance and mass spectrometry data provided the identification of three main compounds: curvulin (**1**), spirostaphylotrichin R (**2**) and U (**3**). The fragmentation mechanism of the precursor ions towards collision induced dissociation (CID) tandem mass spectrometry experiment (MS/MS) is also proposed. Furthermore, biological screening of the crude extracts displayed antileishmanial activity with IC<sub>50</sub> values ranging from 70 to 84.2 µg.mL<sup>-1</sup>.

**Keywords:** *Eichhornia azurea*; *Eichhornia crassipes*; endophytes; MS/MS fragmentation mechanism;

## Experimental

### *Chemical characterization*

$^1\text{H}$  and  $^{13}\text{C}$ -NMR spectra were recorded on a Varian Mercury Plus spectrometer operating at 300 MHz and 75.5 MHz, respectively, using  $\text{CDCl}_3$  as solvent, and tetramethylsilane (TMS) as internal reference. TLC was performed on normal phase pre-coated silica gel 60 G or 60 GF254 (Merck) plates. Visualization of the compounds on TLC was accomplished by UV irradiation at 254 and 366 nm, and/or by spraying with a  $\text{H}_2\text{SO}_4/\text{MeOH}$  (1:1) or  $\text{H}_2\text{SO}_4/\text{anisaldehyde}/\text{acetic acid}$  (1:0.5:50 mL) solution followed by heating at 100 °C.

The  $^1\text{H}$  NMR spectrum from crude extracts showed high similarity, as seen in Figure S1. In addition, due to the high concentration of **1**, **2** and **3** in the crude extracts, were not necessary purification steps to identify these compounds using NMR and MS data. For this reason, only the spectra obtained for the extract of the fungus *Bipolaris* sp. AZ26 are shown in the Figures S2 to S20. The  $^1\text{H}$  NMR spectrum of ethyl 2-acetyl-3,5-dihydroxyphenylacetate (curvulin) (**1**) showed signals for aromatic hydrogens at  $\delta_{\text{H}}$  6.32 and 6.34 (each 1H, br s) relative to H-8 and H-6, a methylene group attached to a carbonyl at  $\delta_{\text{H}}$  3.80 (2H, s), an acetyl group at  $\delta_{\text{H}}$  2.55 (3H, s), and an carboethoxy group at  $\delta_{\text{H}}$  1.23 (3H, t) and 4.13 (2H, q).

The  $^{13}\text{C}$  NMR spectrum displayed two carbonyl carbons at  $\delta_{\text{C}}$  203.6 and 171.6 of ester and acetyl groups, respectively, two phenolic carbons at  $\delta_{\text{C}}$  161.8 and 164.8, a methylene group at  $\delta_{\text{C}}$  41.7, and an ethoxy group at  $\delta_{\text{C}}$  14.3 and 61.6.

The chemical shift values for hydrogens and carbons were in accordance with the literature data of **1** (Varma et al. 2006).

Compounds spirostaphylotrichin R (**2**) and U (**3**) displayed very similar resonances in the  $^1\text{H}$  and  $^{13}\text{C}$  NMR spectra. The difference observed between them were the signals in the  $^{13}\text{C}$  NMR spectrum at  $\delta_{\text{C}}$  23.6 (C-11), 68.7 (C-4) and 86.6 (C-3) of spirostaphylotrichin R and at  $\delta_{\text{C}}$  18.7 (C-11), 73.1(C-4) and 90.5 (C-3) of spirostaphylotrichin U. Comparison of the obtained spectroscopic data with those reported confirmed the chemical structure of the compounds **2** and **3** as spirostaphylotrichin R and U, respectively (Abraham et al. 1995).

Mass spectra analysis of the EtOAc extract were performed at low resolution with electrospray ionization (ESI-MS) on a MICROMASS® Quattro Micro™ API. The mass spectra were recorded with ESI in the positive mode. The parameters were as follows: voltage of the employed capillar: 2.00 kV, cone voltage: 20 V, source temperature: 100 °C, desolvation temperature: 250 °C, desolvation gas flow rate: 400 L h<sup>-1</sup>, cone gas flow rate: 100 L h<sup>-1</sup>, scanning range: from 50 to 500 amu. These parameters were optimized in preliminary experiments to get the highest abundance of the targeted molecular-related ions. N<sub>2</sub> was used as both dry gas and nebulizer gas. As mentioned in the main text, the mass spectrum of EtOAc extract showed a mixture of three compounds with *m/z* 239.0 and *m/z* 298.0, attributed to curvulin (**1**) and spirostaphylotrichin R (**2**) and U (**3**), respectively. The collision induced dissociation (CID) tandem mass spectrometry (MS/MS) using positive mode electrospray ionization of the [M+H]<sup>+</sup> precursor ion of the compounds are demonstrated in the Figures S21 and S22.

**Curvulin (1):** The brown solid (20 mg), <sup>1</sup>H-NMR (300 MHz, CDCl<sub>3</sub>): δ 1.23 (2H, t, *J* = 7.2 Hz, (C1)OCH<sub>2</sub>CH<sub>3</sub>), 2.55 (3H, s, (C-2')-COCH<sub>3</sub>), 3.80 (2H, s, 2-*H*), 4.13 (2H, q, *J* = 7.2 Hz, (C1)OCH<sub>2</sub>CH<sub>3</sub>), 6.32 (1H, sbr, 6'-*H*), 6.34 (1H, sbr, 4'-*H*); <sup>13</sup>C-NMR (75.5 MHz, CDCl<sub>3</sub>): δ 14.3 ((C1)OCH<sub>2</sub>CH<sub>3</sub>), 32.1 ((C-2')-COCH<sub>3</sub>), 41.7 (C-2), 61.3 ((C1)OCH<sub>2</sub>CH<sub>3</sub>), 103.1 (C-4'), 113.1 (C-6'), 116.1 (C-2'), 137.4 (C-1'), 161.8 (C-3'), 164.8 (C-5'), 171.6 (C-1), 203.6 ((C-2')-COCH<sub>3</sub>); **ESI-MS** (positive) *m/z* 239.0 [M+H]<sup>+</sup>.

**Spirostaphylotrichin R (2):** The brown solid (30 mg), <sup>1</sup>H-NMR (300 MHz, CDCl<sub>3</sub>): δ 1.03 (3H, s, 14-*H*), 1.61 (3H, s, 11-*H*), 2.19 (2H, m, 13-*H*), 3.96 (3H, s, 15-*H*), 4.07 (1H, s, 4-*H*), 4.75 (2H, s, 6-*H*), 5.90 (1H, d, *J* = 9.0 Hz, 8-*H*), 6.14, (1H, t, *J* = 7.5 Hz, 12-*H*), 7.05 (1H, d, *J* = 9.0 Hz, 9-*H*); <sup>13</sup>C-NMR (75.5 MHz, CDCl<sub>3</sub>): δ 13.2 (C-14), 23.6 (C-11), 23.7 (C-13), 56.8 (C-5), 64.8 (C-15), 68.7 (C-5), 73.4 (C-6), 86.8 (C-3), 120.8 (C-8), 127.7 (C-10), 150.7 (C-12), 153.0 (C-9), 167.7 (C-1), 196.1 (C-7); **ESI-MS** (positive) *m/z* 298.0 [M+H]<sup>+</sup>.

**Spirostaphylotrichin U (3):** The brown solid (30 mg), <sup>1</sup>H-NMR (300 MHz, CDCl<sub>3</sub>): δ 1.01 (3H, s, 14-*H*), 1.55 (3H, s, 11-*H*), 2.19 and 2.25 (2H, m, 13-*H*), 3.84 (1H, s, 4-*H*), 3.97 (3H, d, *J* = 3.0 Hz, 15-*H*), 4.74 (2H, s, 6-*H*), 5.87 (1H, d, *J* = 9.0 Hz, 8-*H*), 6.27 (1H, s, 12-*H*), 7.01 (1H, d, *J* = 9.0 Hz, 9-*H*); <sup>13</sup>C-NMR (75.5 MHz, CDCl<sub>3</sub>): δ 13.5 (C-14), 18.8 (C-11), 23.4

(C-13), 56.9 (C-5), 64.6 (C-15), 73.3 (C-4), 73.5 (C-6), 90.8 (C-3), 120 (C-8), 128.9 (C-10), 153.4 (C-9), 153.7 (C-12), 167.5 (C-1), 197.6 (C-7); **ESI-MS** (positive)  $m/z$  298.0 [M+H]<sup>+</sup>.

**Figure S1.** Comparison of  $^1\text{H}$  Nuclear magnetic resonance spectra ( $\text{CDCl}_3$ ; 300 MHz) of EtOAc extract of *Bipolaris* sp. AZ26 and *Bipolaris* sp. C36.

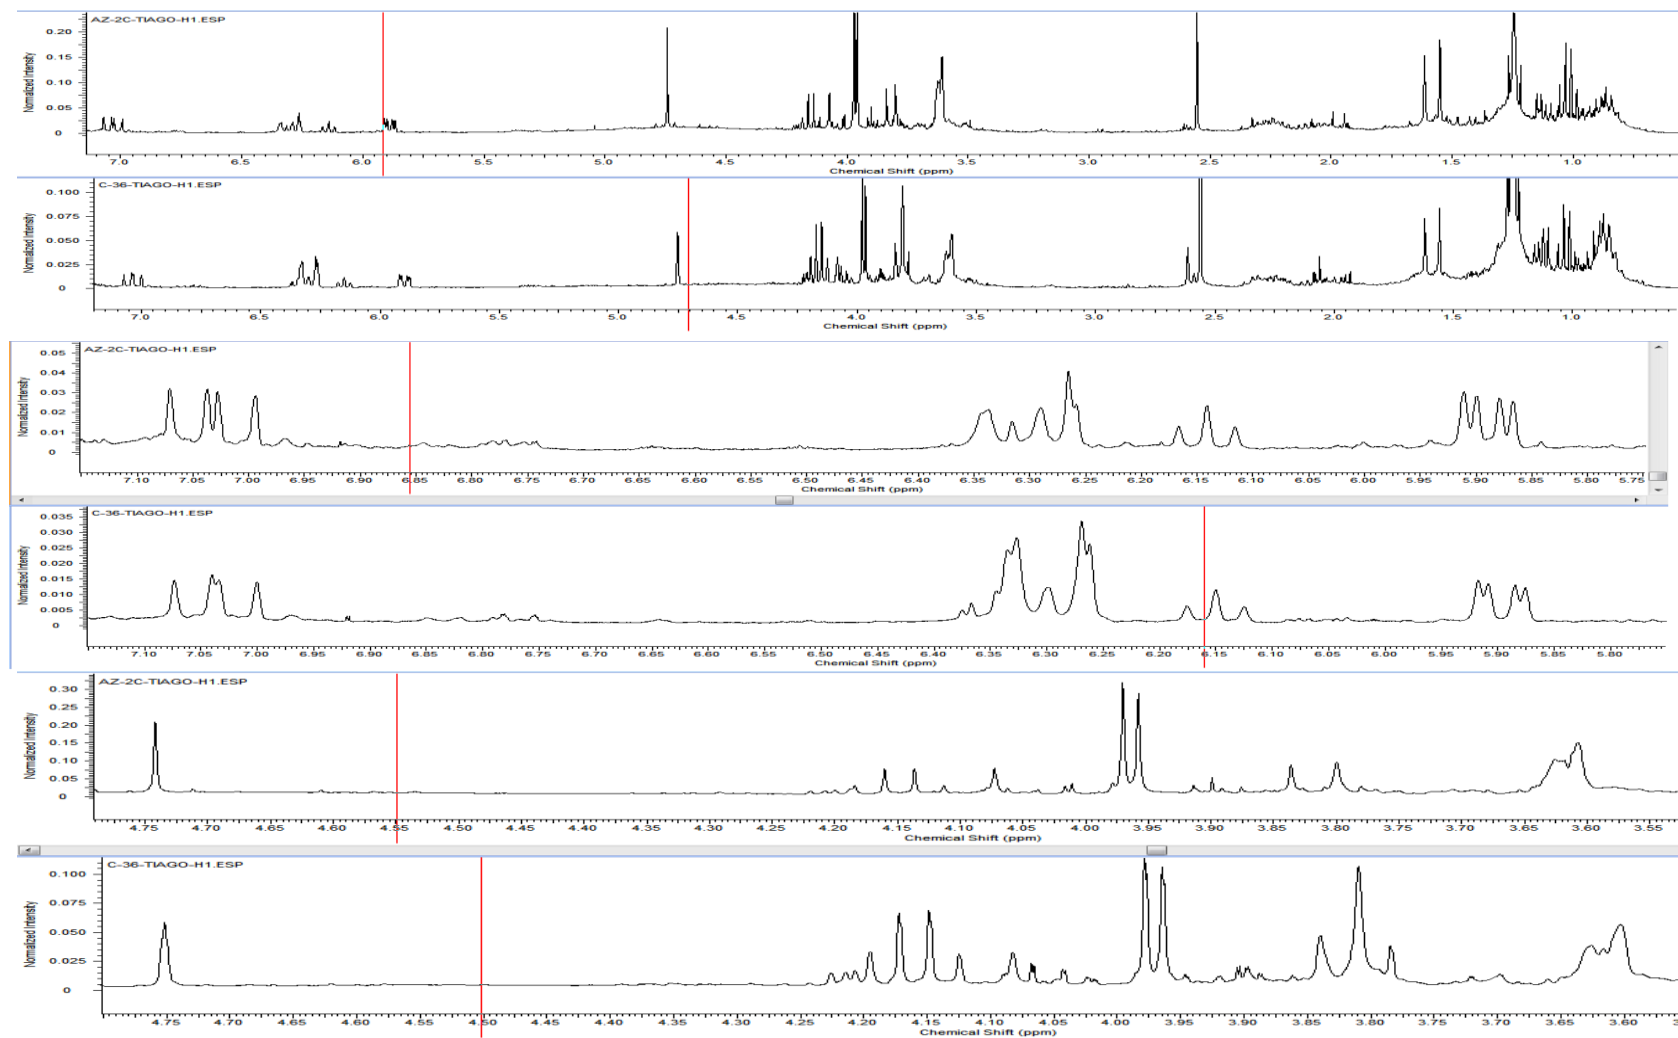

**Figure S2.**  $^1\text{H}$  Nuclear magnetic resonance spectra ( $\text{CDCl}_3$ ; 300 MHz) of EtOAc extract AZ-26.

AZ-2C-TIAGO-H1.esp

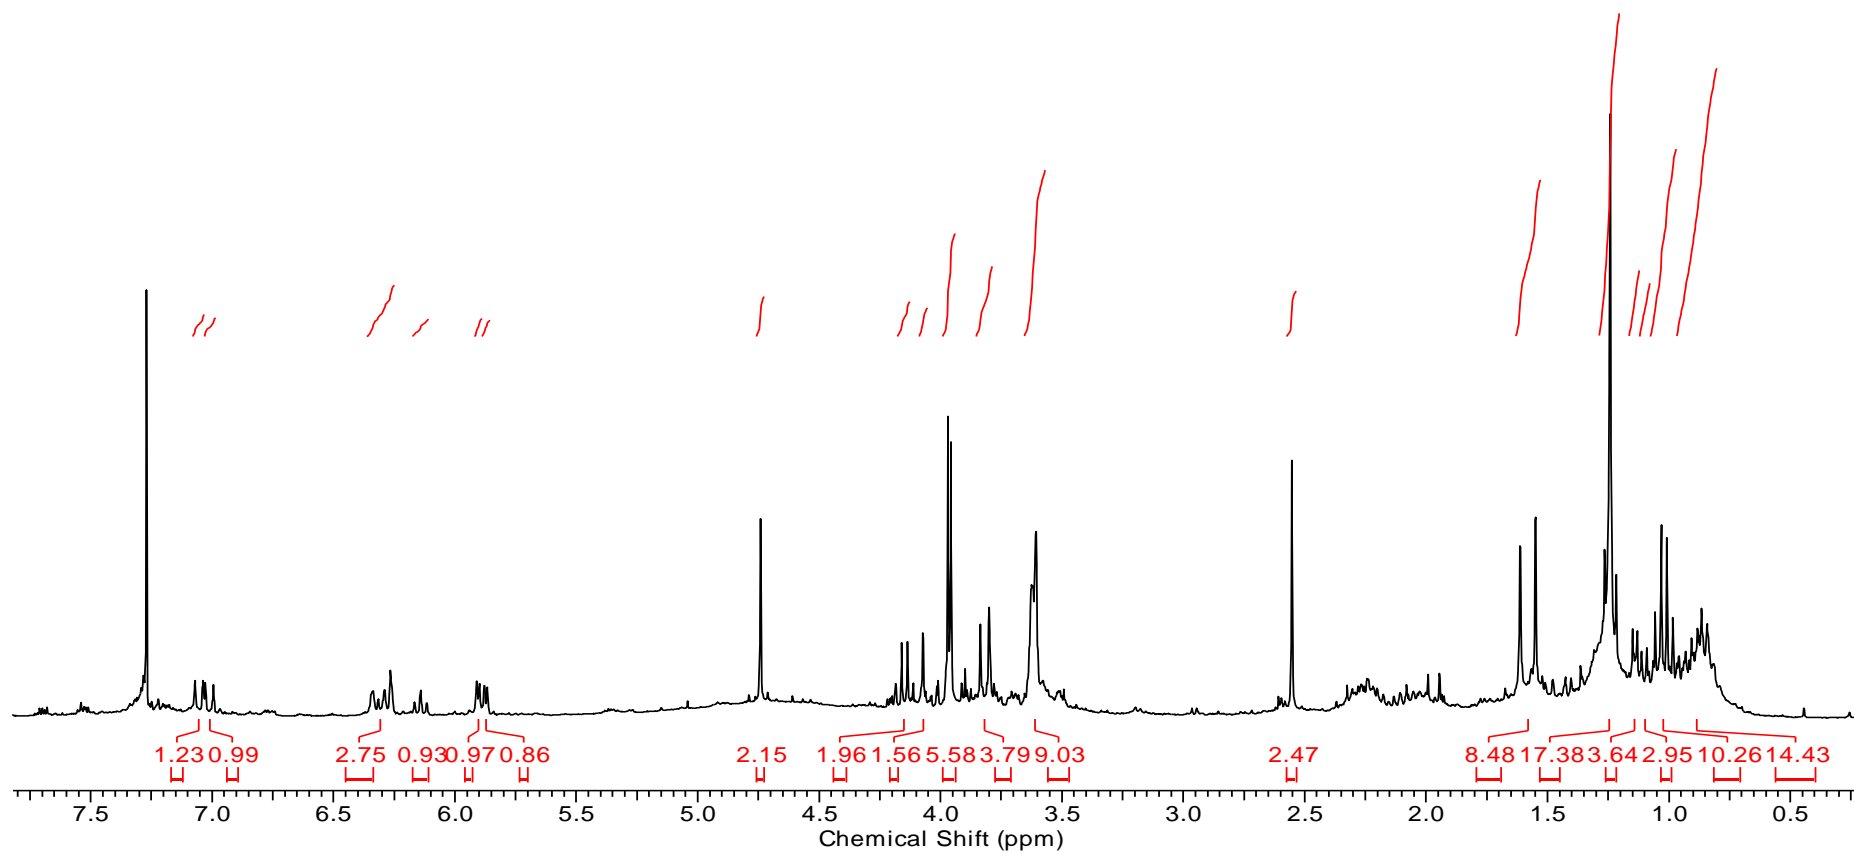

**Figure S3.**  $^1\text{H}$  Nuclear magnetic resonance spectra ( $\text{CDCl}_3$ ; 300 MHz) of EtOAc extract AZ-26.

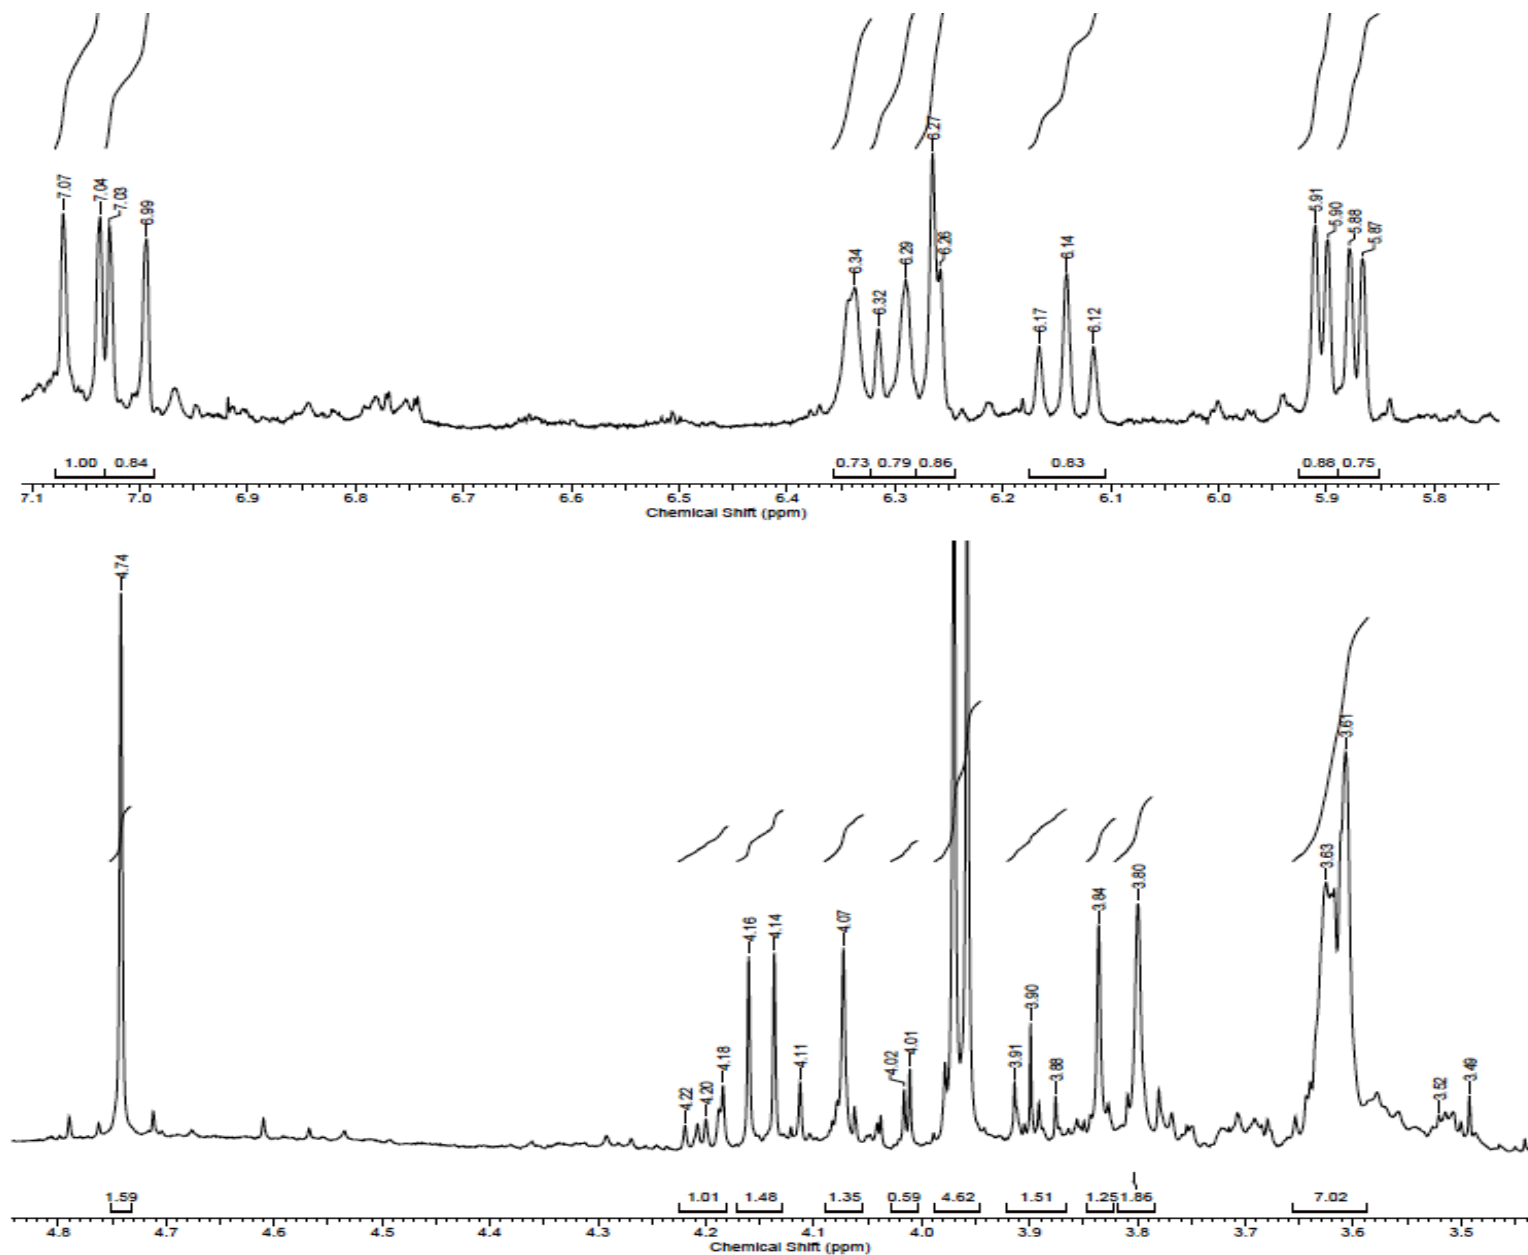

**Figure S4.**  $^1\text{H}$  Nuclear magnetic resonance spectra ( $\text{CDCl}_3$ ; 300 MHz) of EtOAc extract AZ-26.

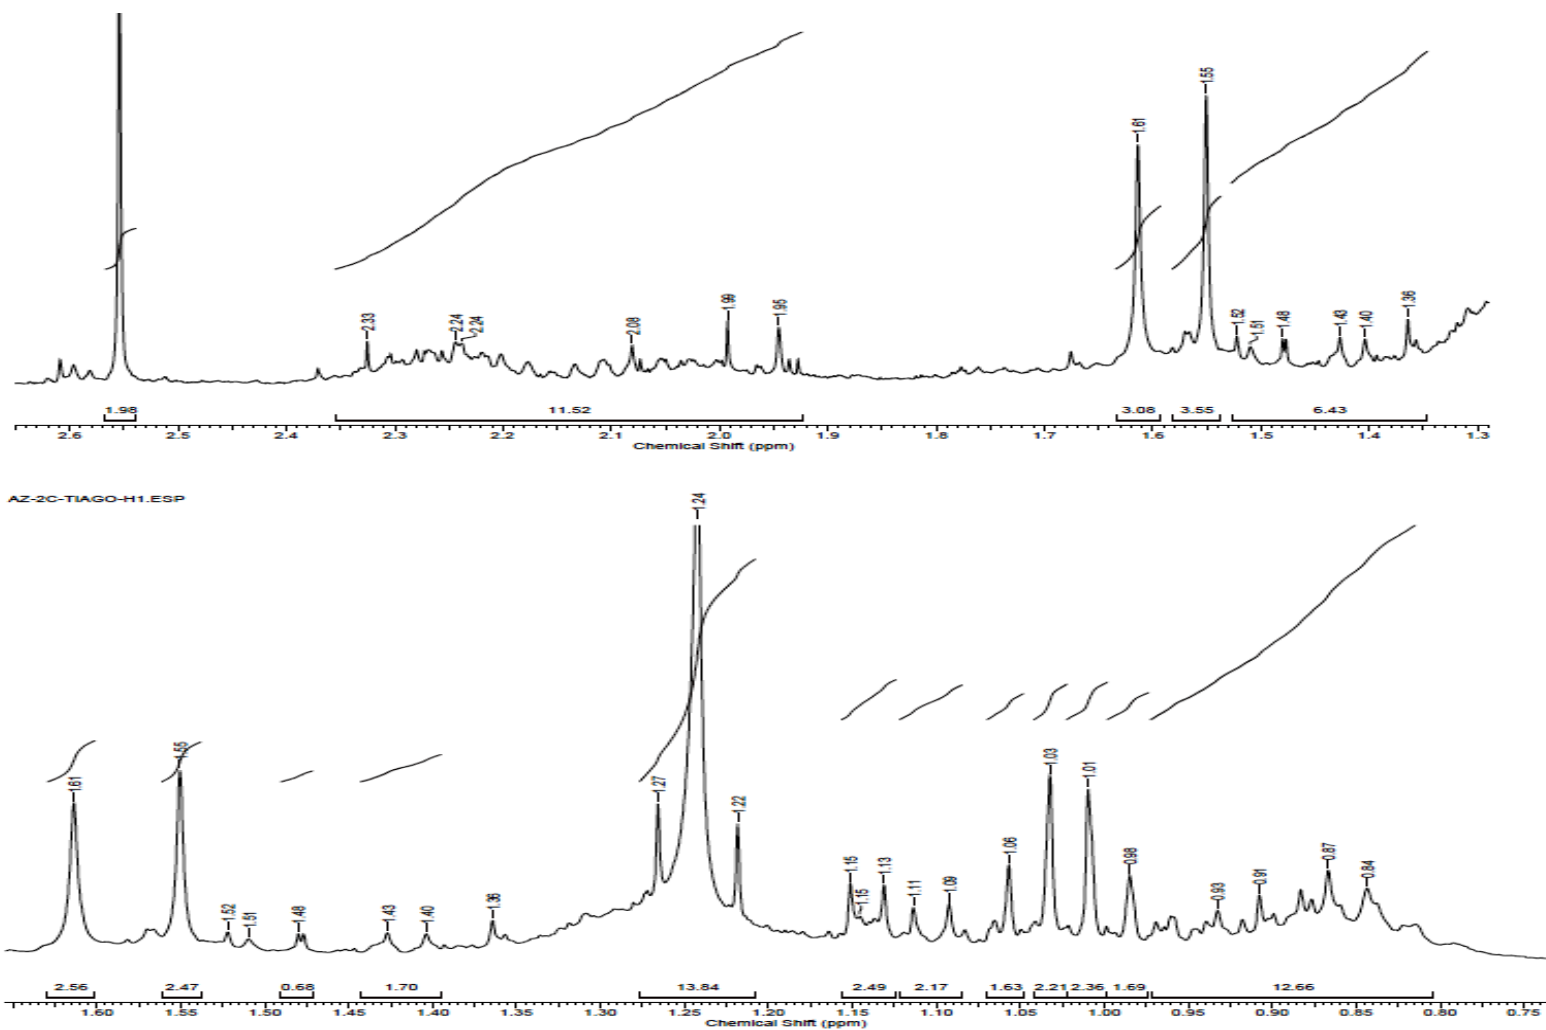



**Figure S5.** COSY spectra (CDCl<sub>3</sub>; 300 MHz) of EtOAc extract AZ-26.

```
AZ-2C-TIAGO-gCOSY
Marcos-Del
File: AZ-2C-TIAGO-gCOSY
Pulse Sequence: gCOSY
Solvent: cdcl3
Ambient temperature
Operator: Ivania
File: AZ-2C-TIAGO-gCOSY
Mercury-300BB "uom-dq1-rm"

Relax. delay 1.301 sec
Acq. time 0.160 sec
Width 3202.0 Hz
2D Width 3202.0 Hz
2 repetitions
256 increments
OBSERVE F1 300.0569424 MHz
DATA PROCESSING
Sf. sine bell 0.080 sec
F1 DATA PROCESSING
Sf. sine bell 0.080 sec
F1 size 4096 x 4096
Total time 14 min, 52 sec
```

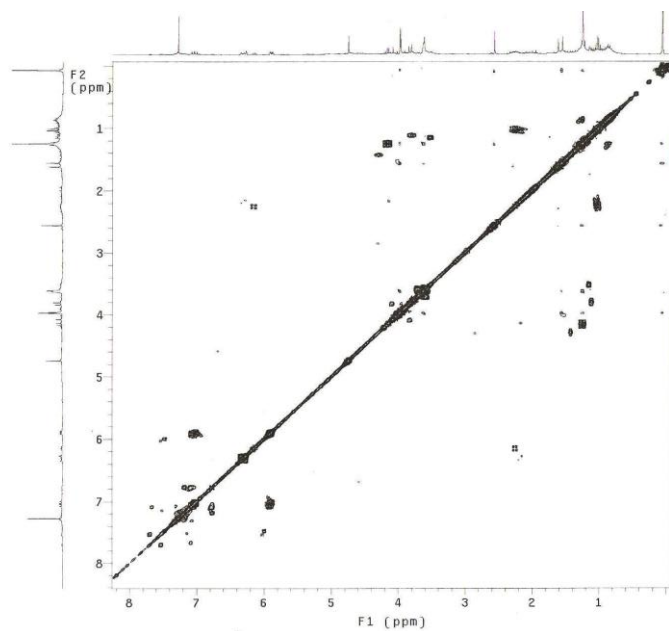

**Figure S6.** COSY spectra (CDCl<sub>3</sub>; 300 MHz) of EtOAc extract AZ-26.

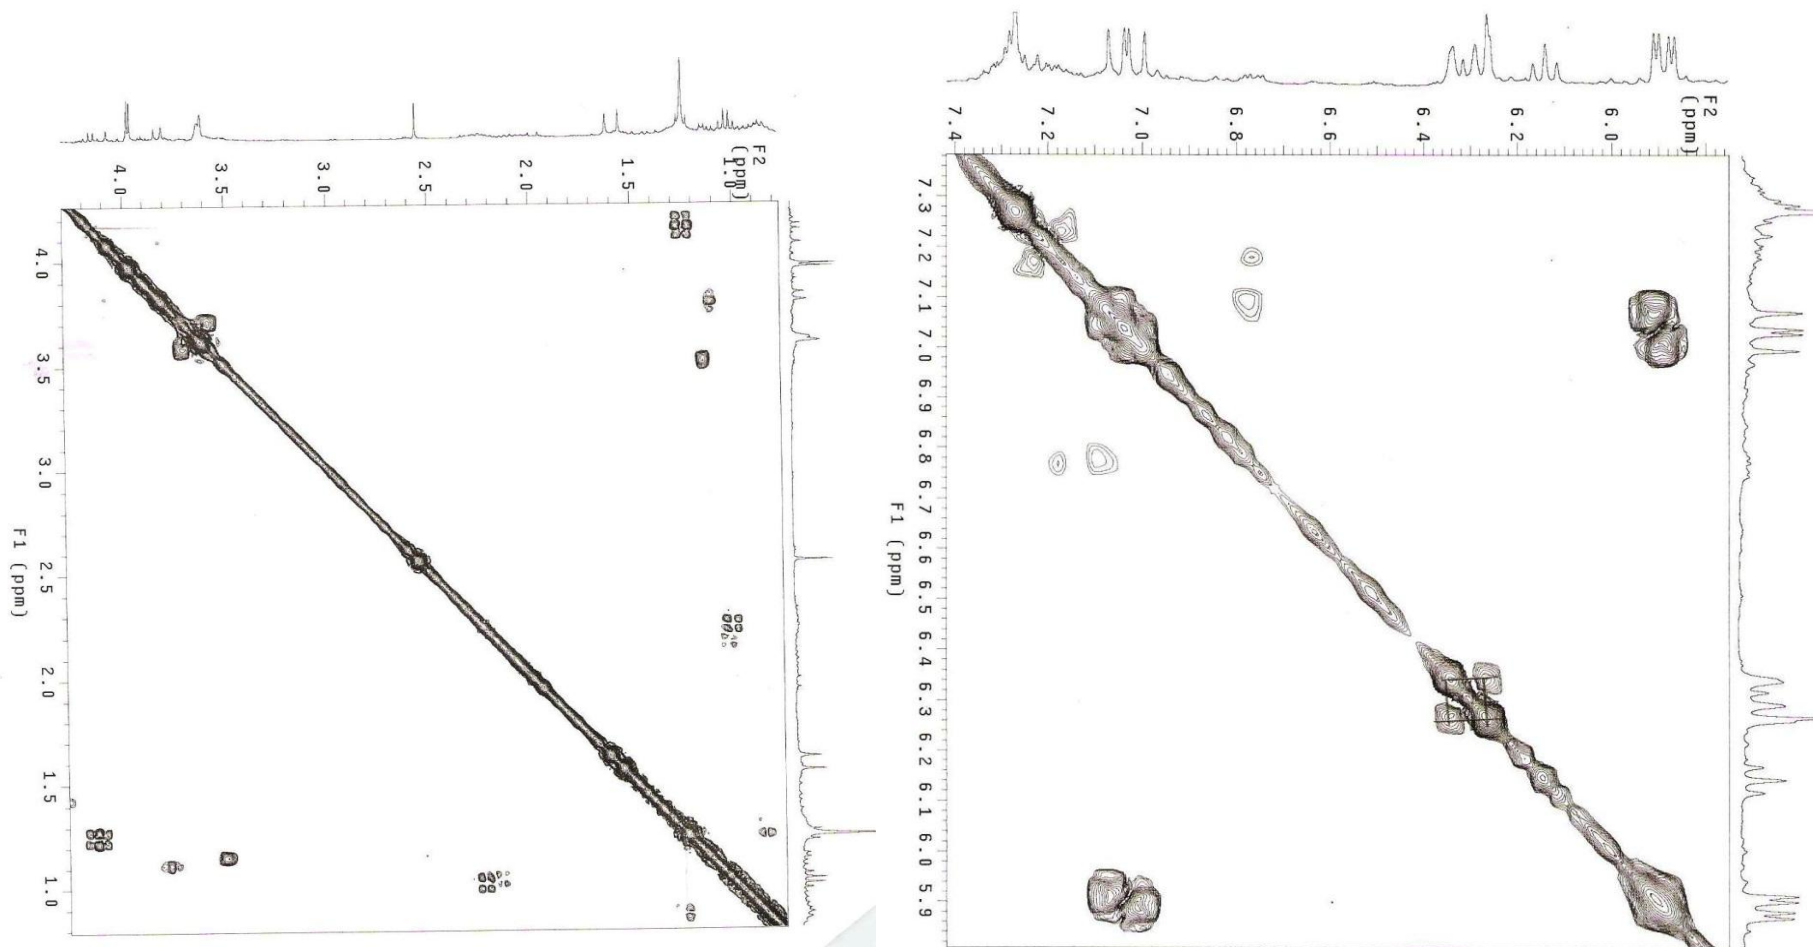

Figure S7.  $^{13}\text{C}$  Nuclear magnetic resonance spectra ( $\text{CDCl}_3$ ; 300 MHz) of EtOAc extract AZ-26.

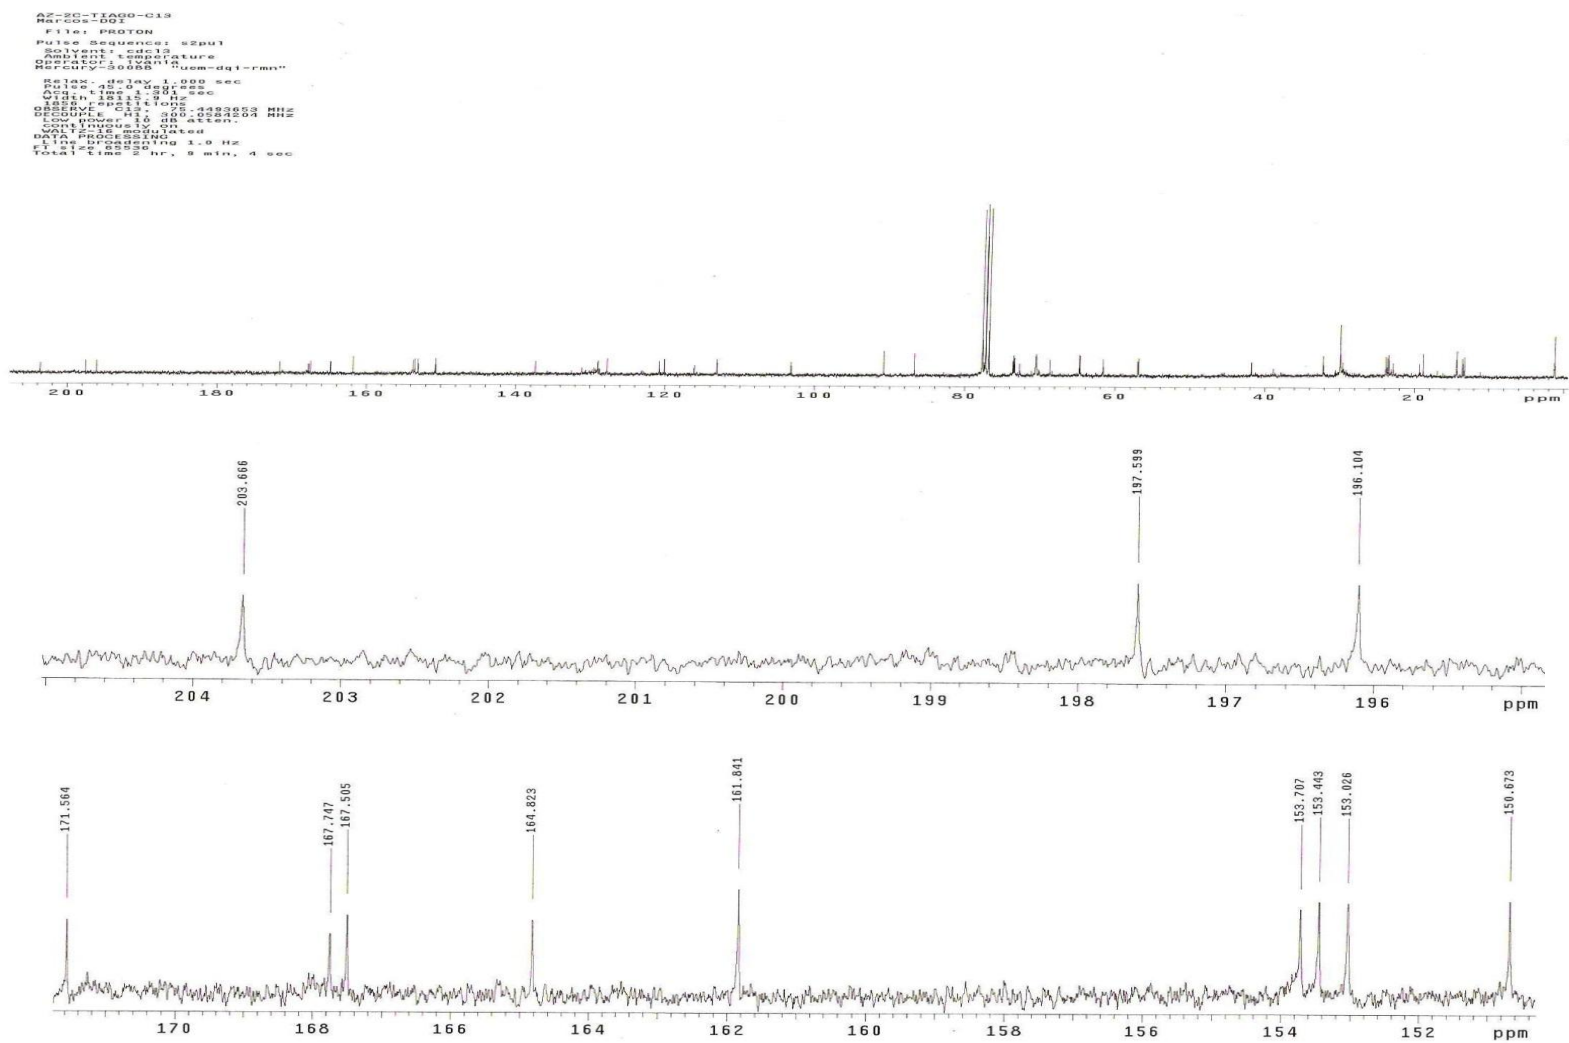

**Figure S8.**  $^{13}\text{C}$  Nuclear magnetic resonance spectra ( $\text{CDCl}_3$ ; 300 MHz) of EtOAc extract AZ-26.

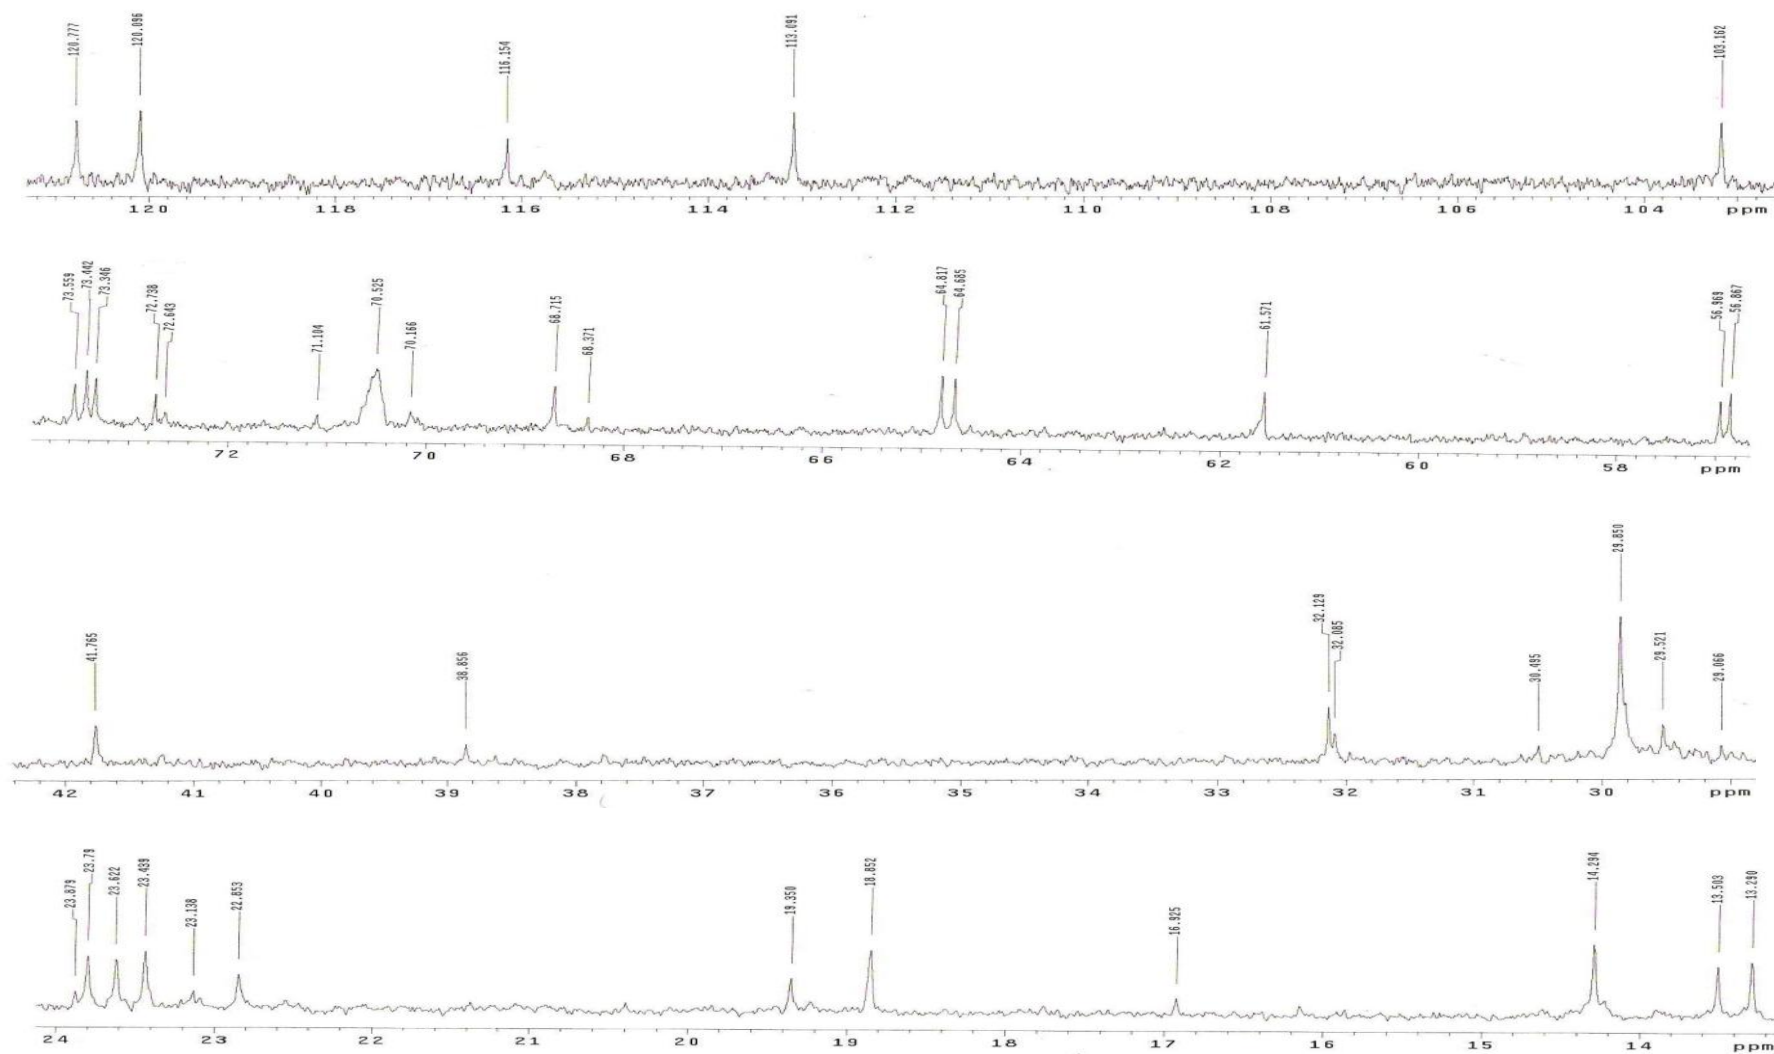

**Figure S9.** DEPT spectra (CDCl<sub>3</sub>; 300 MHz) of EtOAc extract AZ-26.

AZ-2C-TIAGO-C13  
Marcos-DQI  
File: PROTON  
Pulse Sequence: s2pu1  
Solvent: cdc13  
Ambient temperature  
Operator: ivania  
Mercury-300BB "uem-dqi-rmn"  
  
Relax. delay 1.000 sec  
Pulse 45.0 degrees  
Acq. time 1.301 sec  
Width 18115.9 Hz  
1856 repetitions  
OBSERVE C13, 75.4493653 MHz  
DECOUPLE H1, 300.0584204 MHz  
Low power 10 dB atten.  
continuously on  
WALTZ-16 modulated  
DATA PROCESSING  
Line broadening 1.0 Hz  
FT size 65536  
Total time 2 hr, 9 min, 4 sec

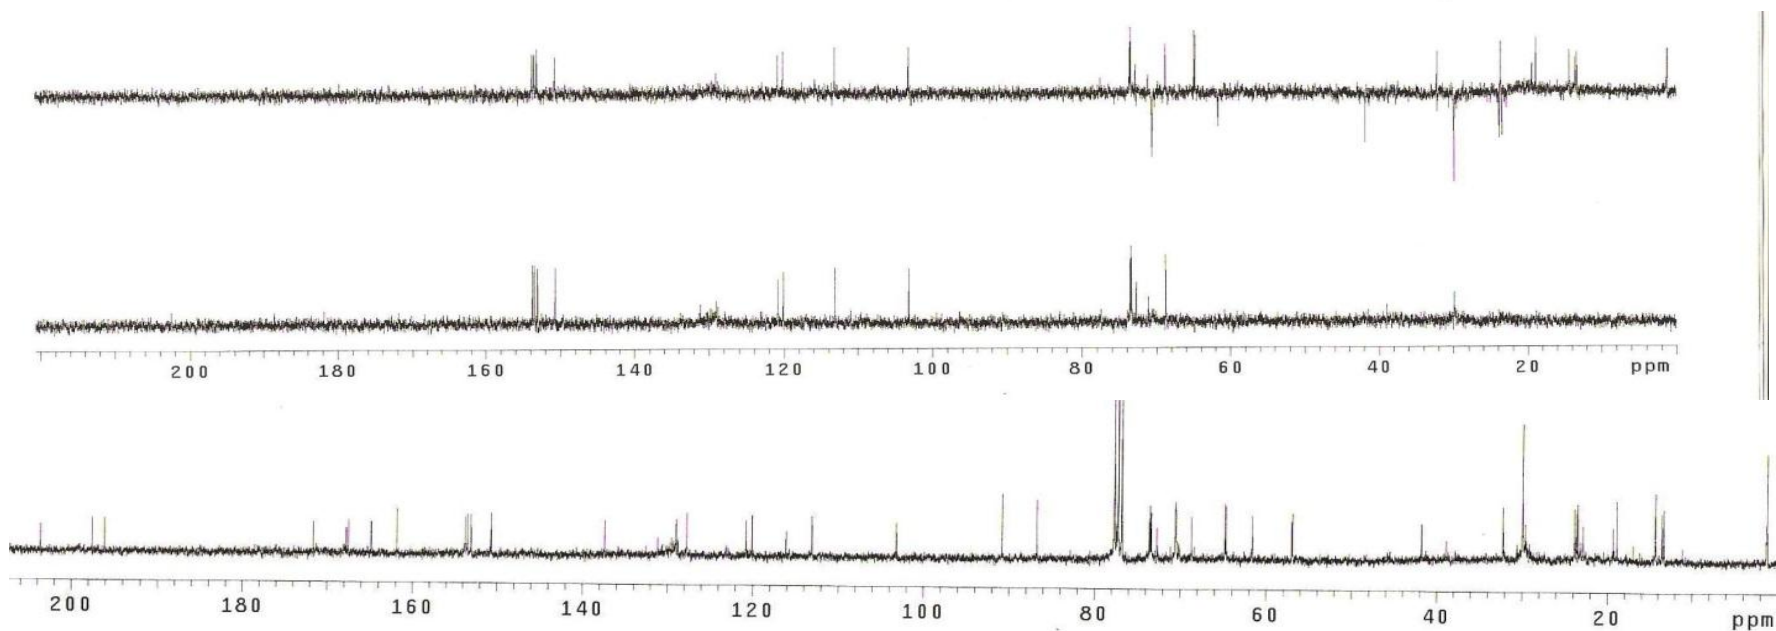

**Figure S10.** HSQC spectra (CDCl<sub>3</sub>; 300 MHz) of EtOAc extract AZ-26.

AZ-2C-TIAG0-gHSQC  
Marcos-DQI

File: PROTON

Pulse Sequence: gHSQC

Solvent: cdc13

Ambient temperature

Operator: ivania

Mercury-300BB "uem-dqi-rmn"

Relax. delay 1.301 sec  
Acq. time 0.199 sec  
Width 3202.0 Hz  
2D Width 12826.7 Hz  
4 repetitions  
2 x 128 increments  
OBSERVE H1, 300.0569617 MHz  
DECOUPLE C13, 75.4550373 MHz  
Low power 10 dB atten.  
on during acquisition  
off during delay  
GARP-1 modulated  
DATA PROCESSING  
Gauss apodization 0.092 sec  
F1 DATA PROCESSING  
Gauss apodization 0.009 sec  
FT size 2048 x 2048  
Total time 29 min, 16 sec

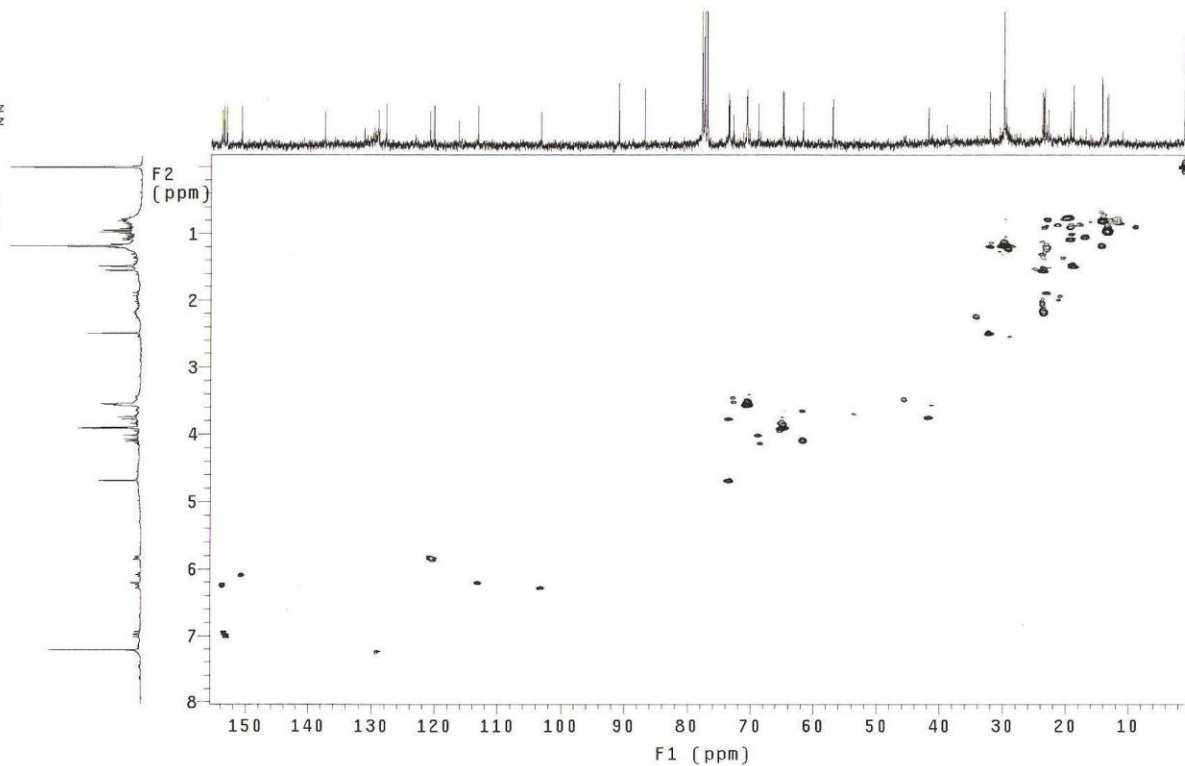

**Figure S11.** HSQC spectra (CDCl<sub>3</sub>; 300 MHz) of EtOAc extract AZ-26.

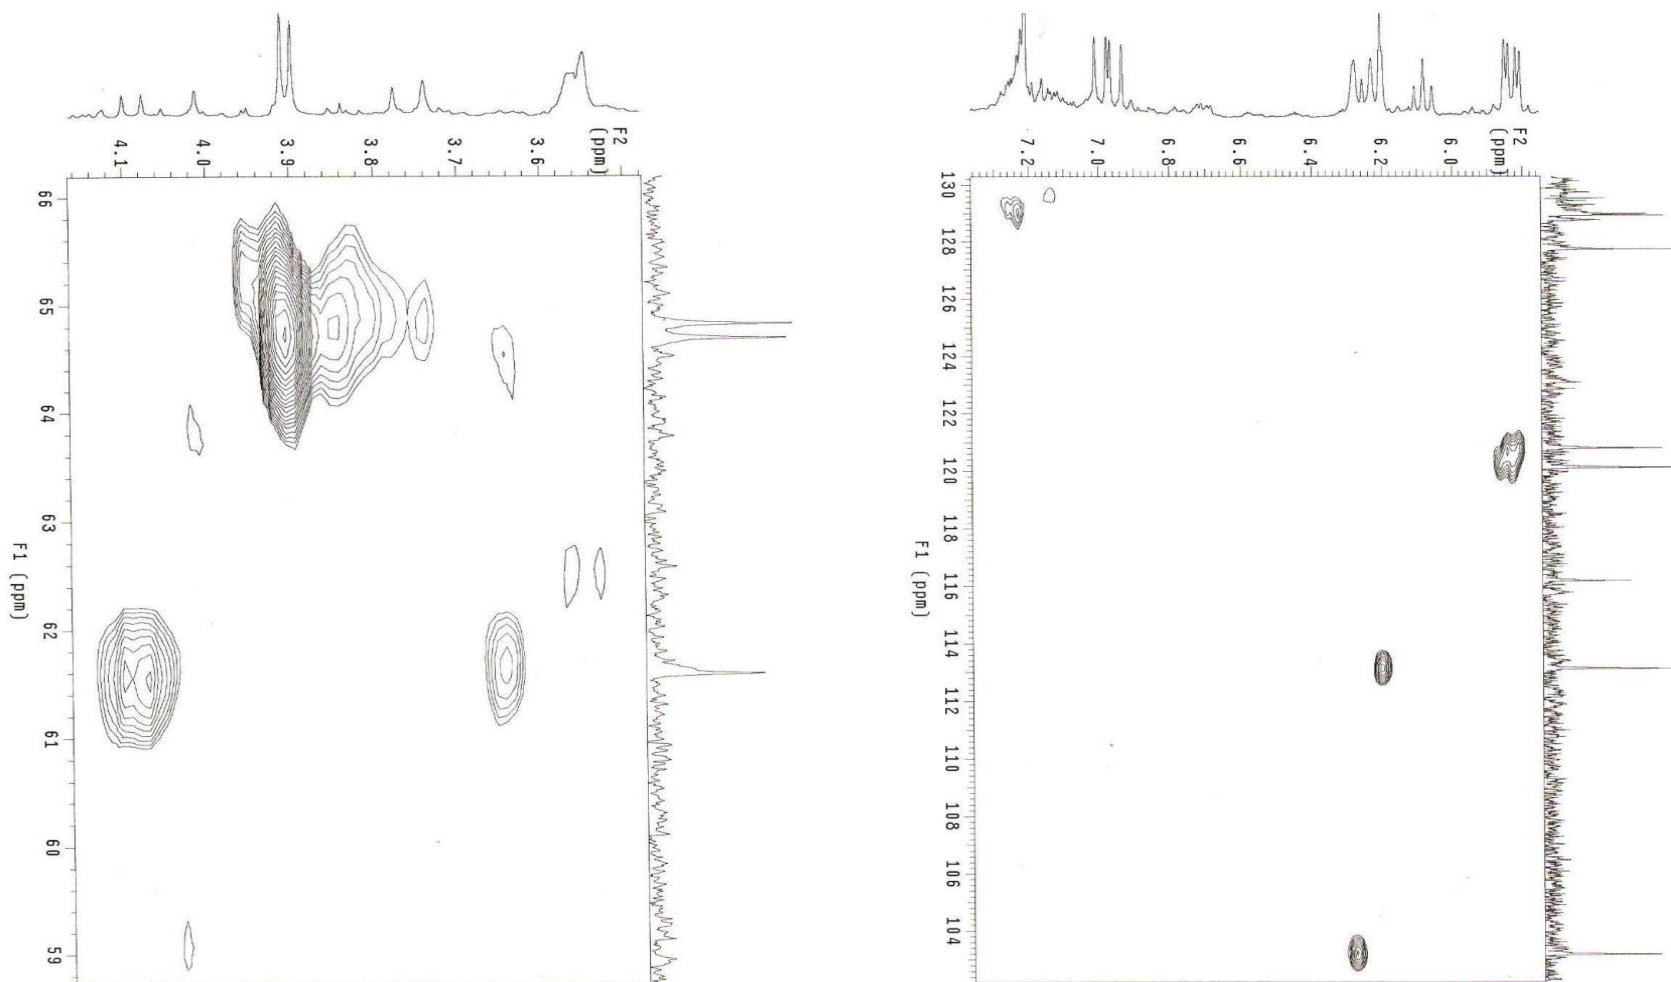

**Figure S12.** HSQC spectra (CDCl<sub>3</sub>; 300 MHz) of EtOAc extract AZ-26.

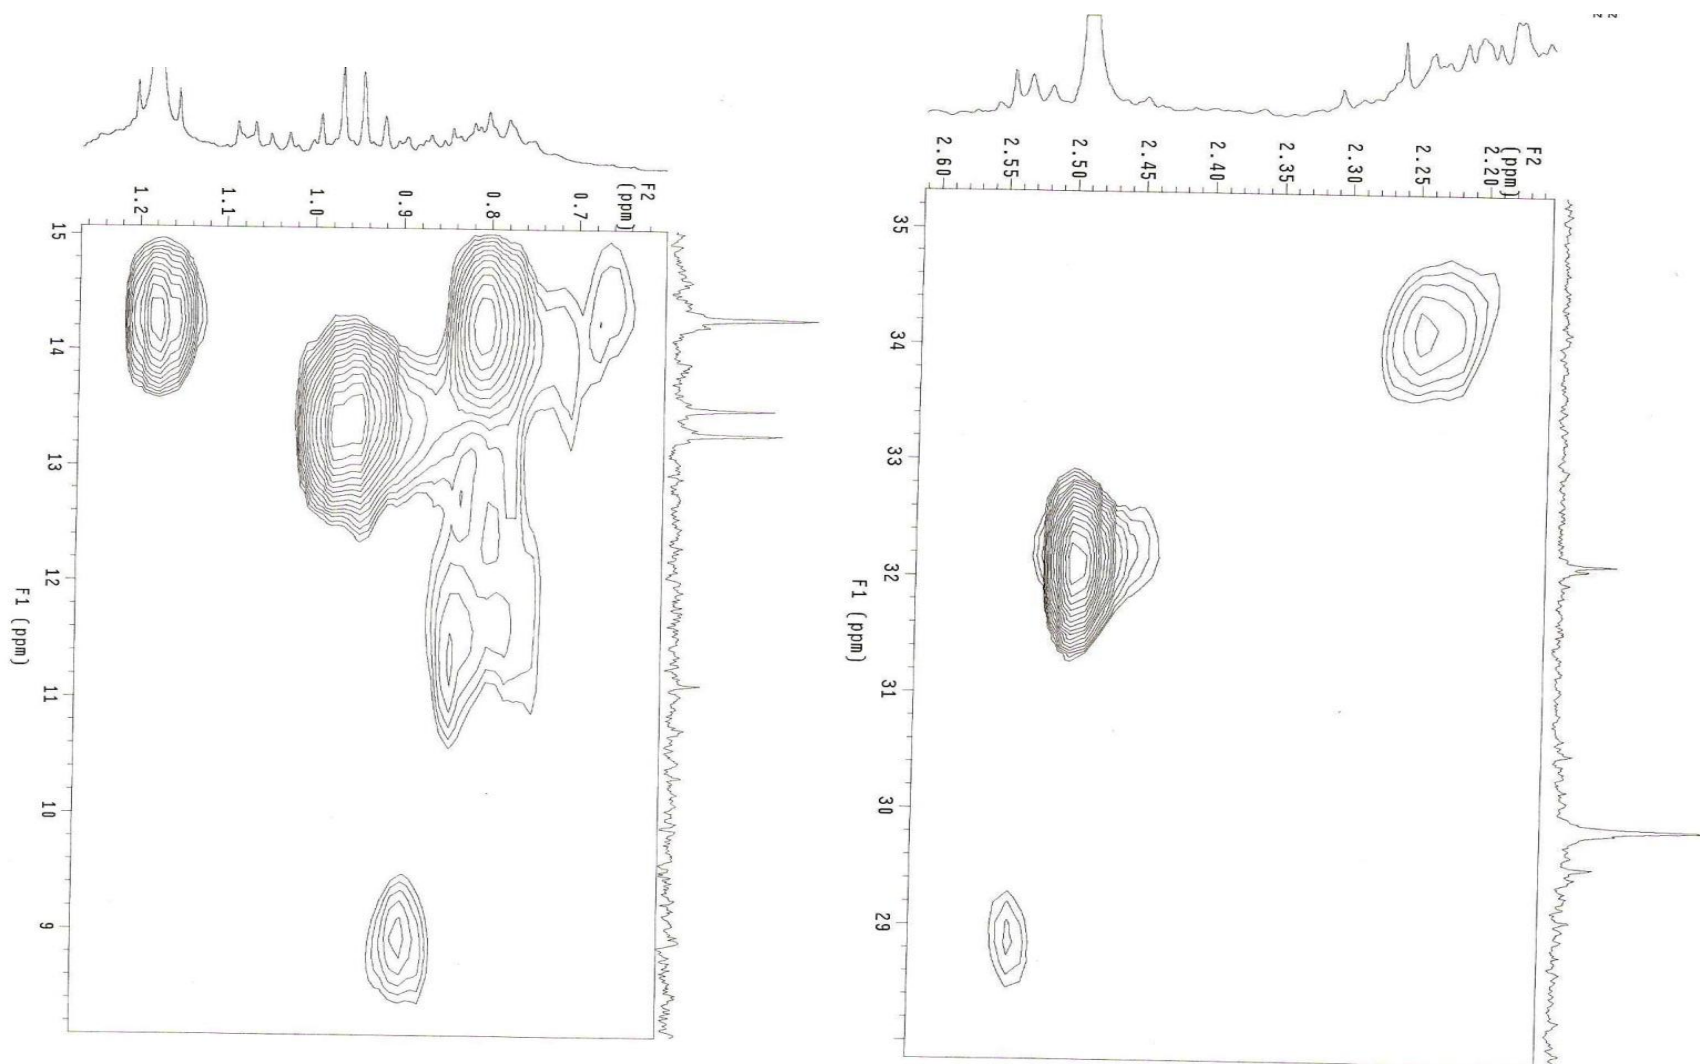



**Figure S13:** HMBC spectra (CDCl<sub>3</sub>; 300 MHz) of EtOAc extract AZ-26.

AZ-2C-TIAGO-gHMBC  
Marcos Ribeiro-DQ1

File: PROTON

Pulse Sequence: gHMBC

Solvent: cdc13

Temp. 26.0 C / 299.1 K

Operator: ivania

Mercury-300BB "uem-dqi-rmn"

Relax. delay 1.500 sec

Mixing 0.080 sec

Acq. time 0.128 sec

Width 3049.7 Hz

2D Width 18107.7 Hz

32 repetitions

200 increments

OBSERVE H1, 300.0569443 MHz

DATA PROCESSING

Sine bell 0.064 sec

F1 DATA PROCESSING

Sine bell 0.011 sec

FT size 2048 x 2048

Total time 3 hr, 8 min, 21 sec

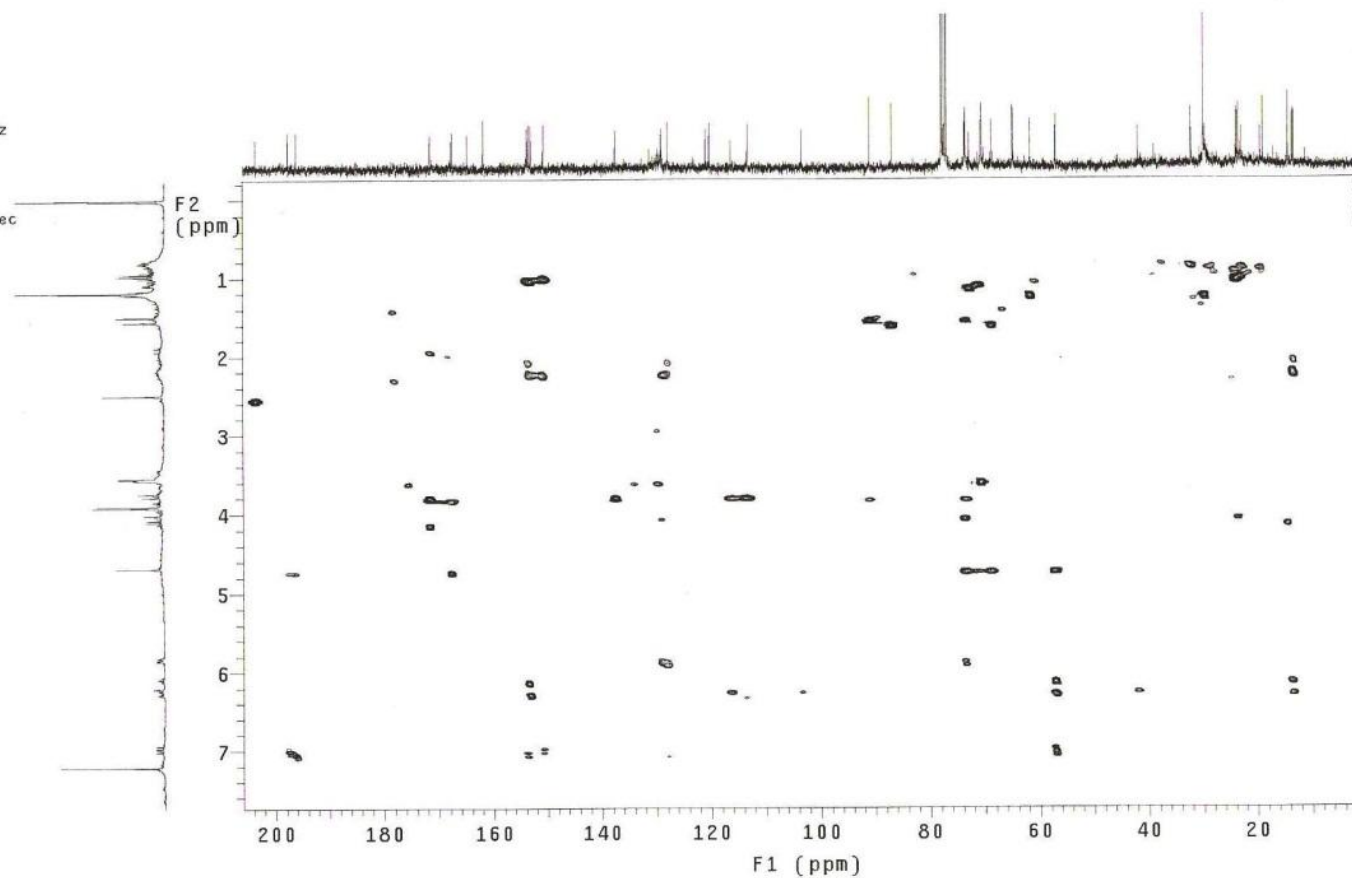

**Figure S14.** HMBC spectra (CDCl<sub>3</sub>; 300 MHz) of EtOAc extract AZ-26.

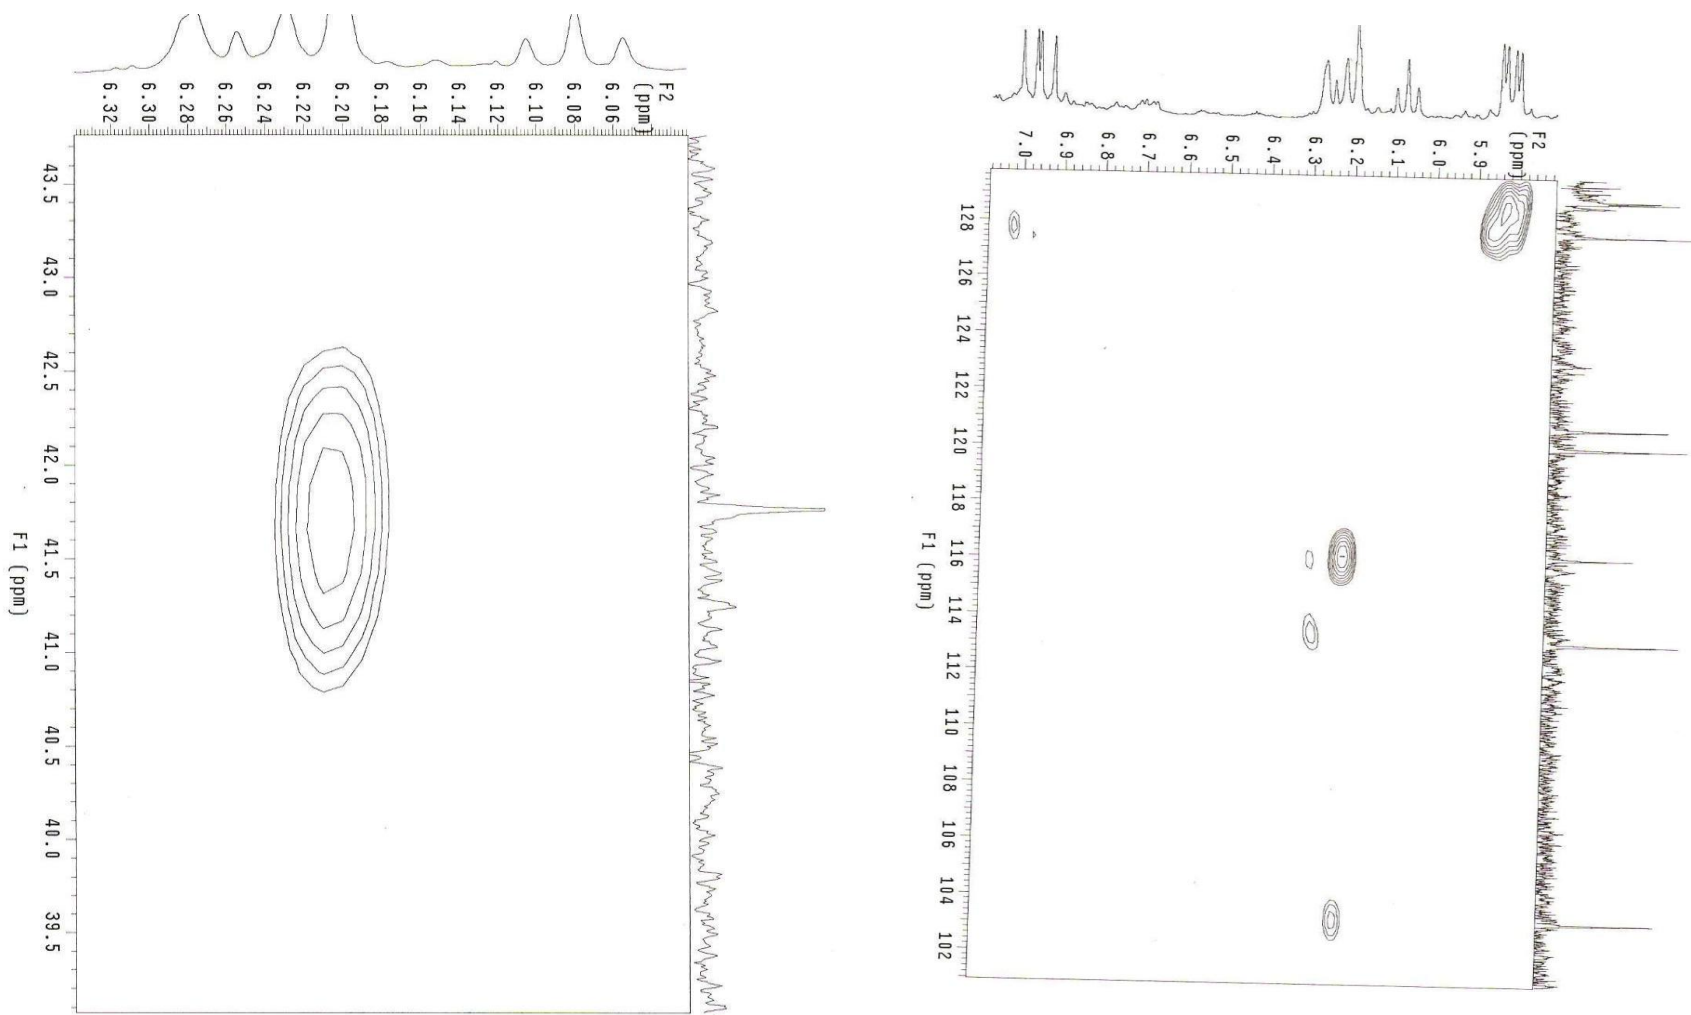

**Figure S15.** HMBC spectra (CDCl<sub>3</sub>; 300 MHz) of EtOAc extract AZ-26.

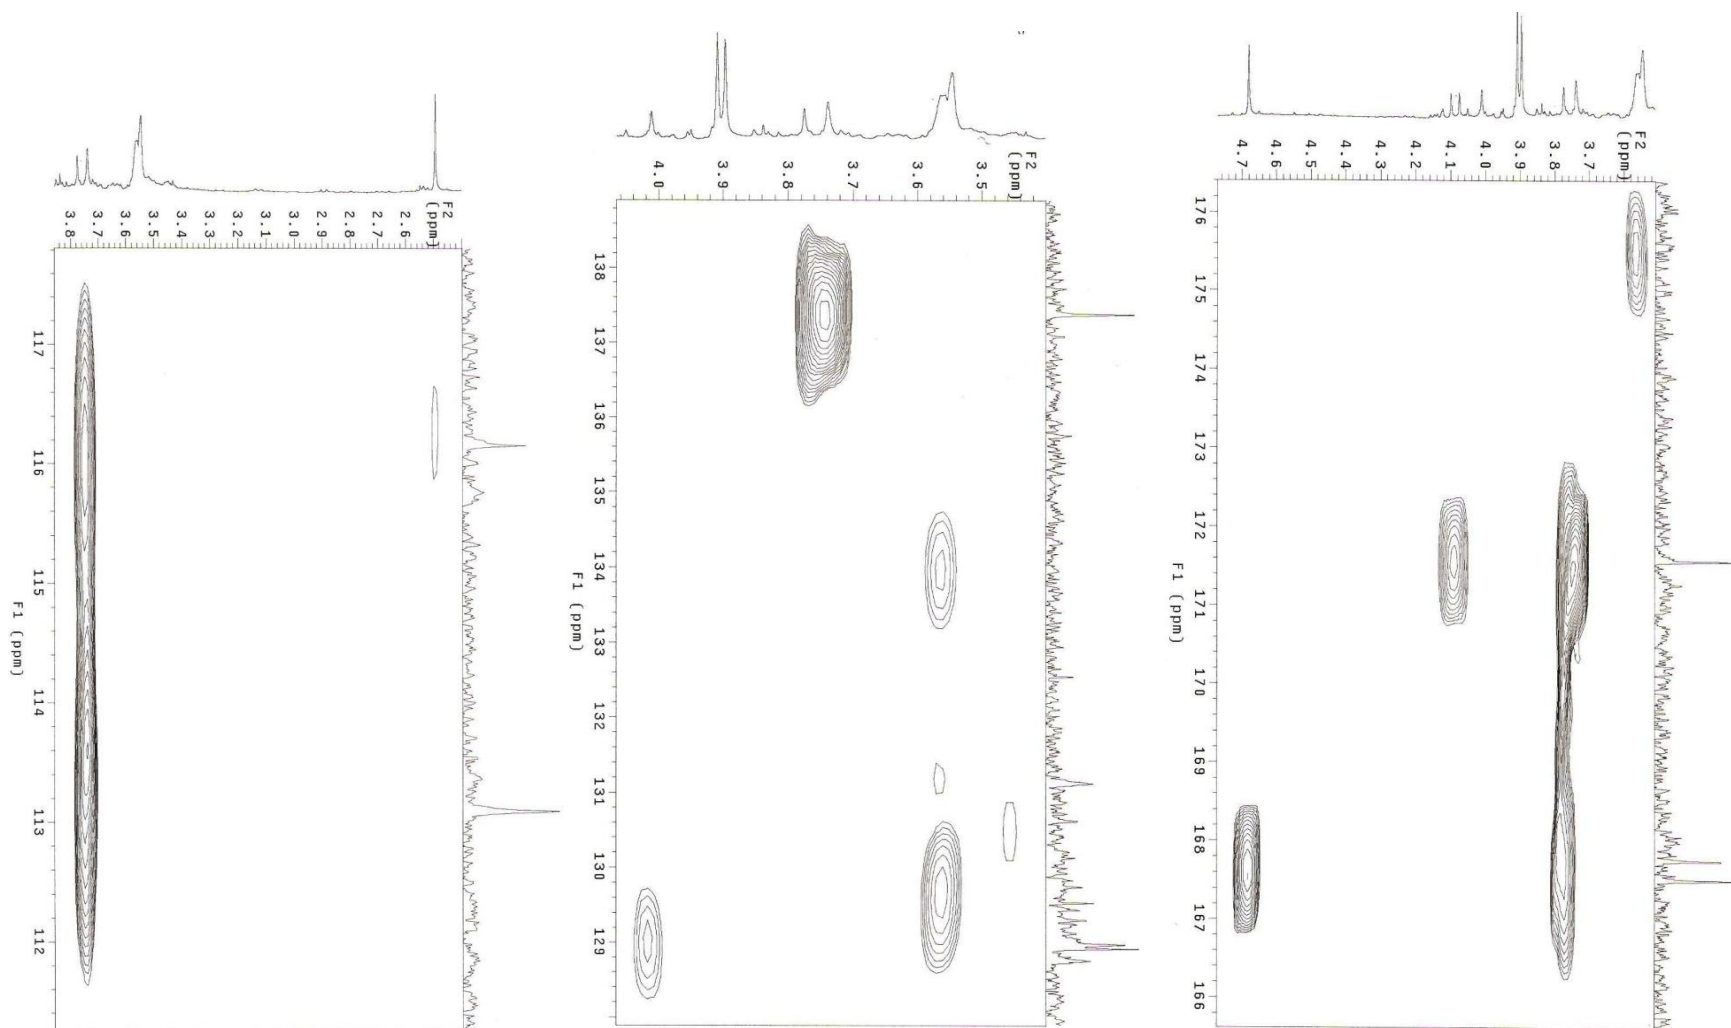

**Figure S16.** HMBC spectra (CDCl<sub>3</sub>; 300 MHz) of EtOAc extract AZ-26.

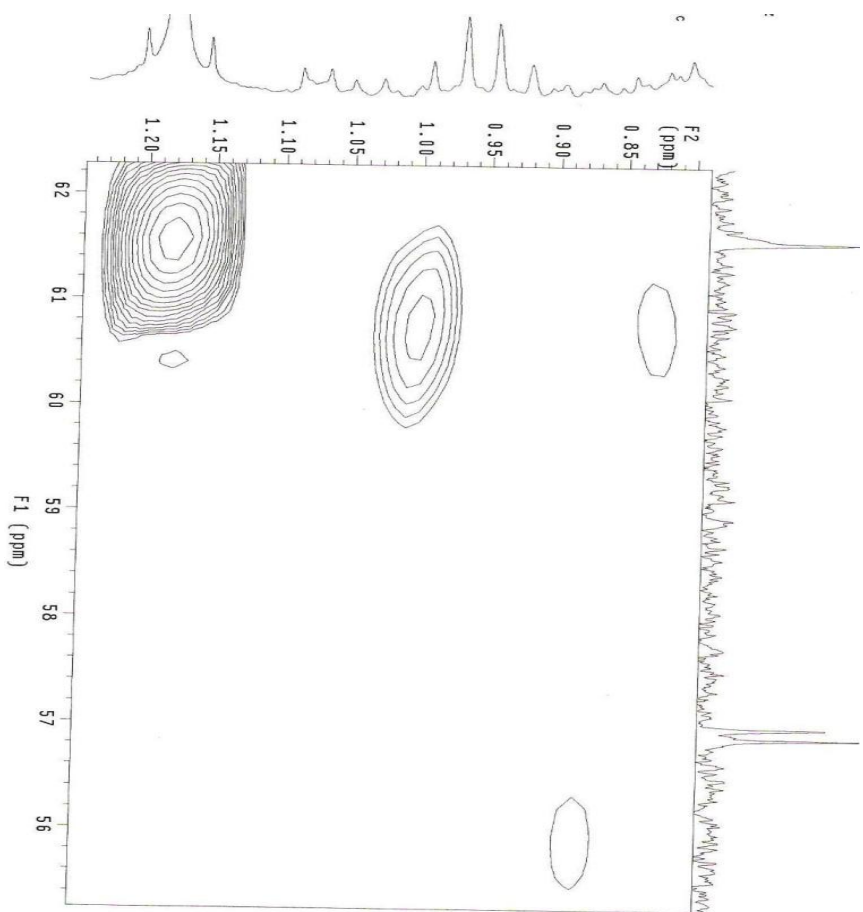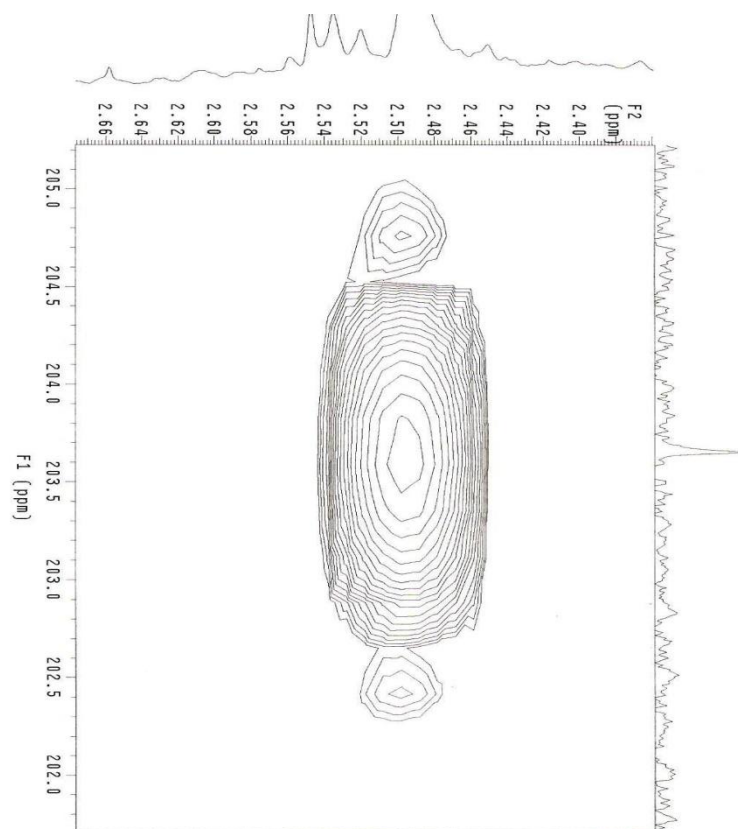

**Figure S17.** HMBC spectra (CDCl<sub>3</sub>; 300 MHz) of EtOAc extract AZ-26.

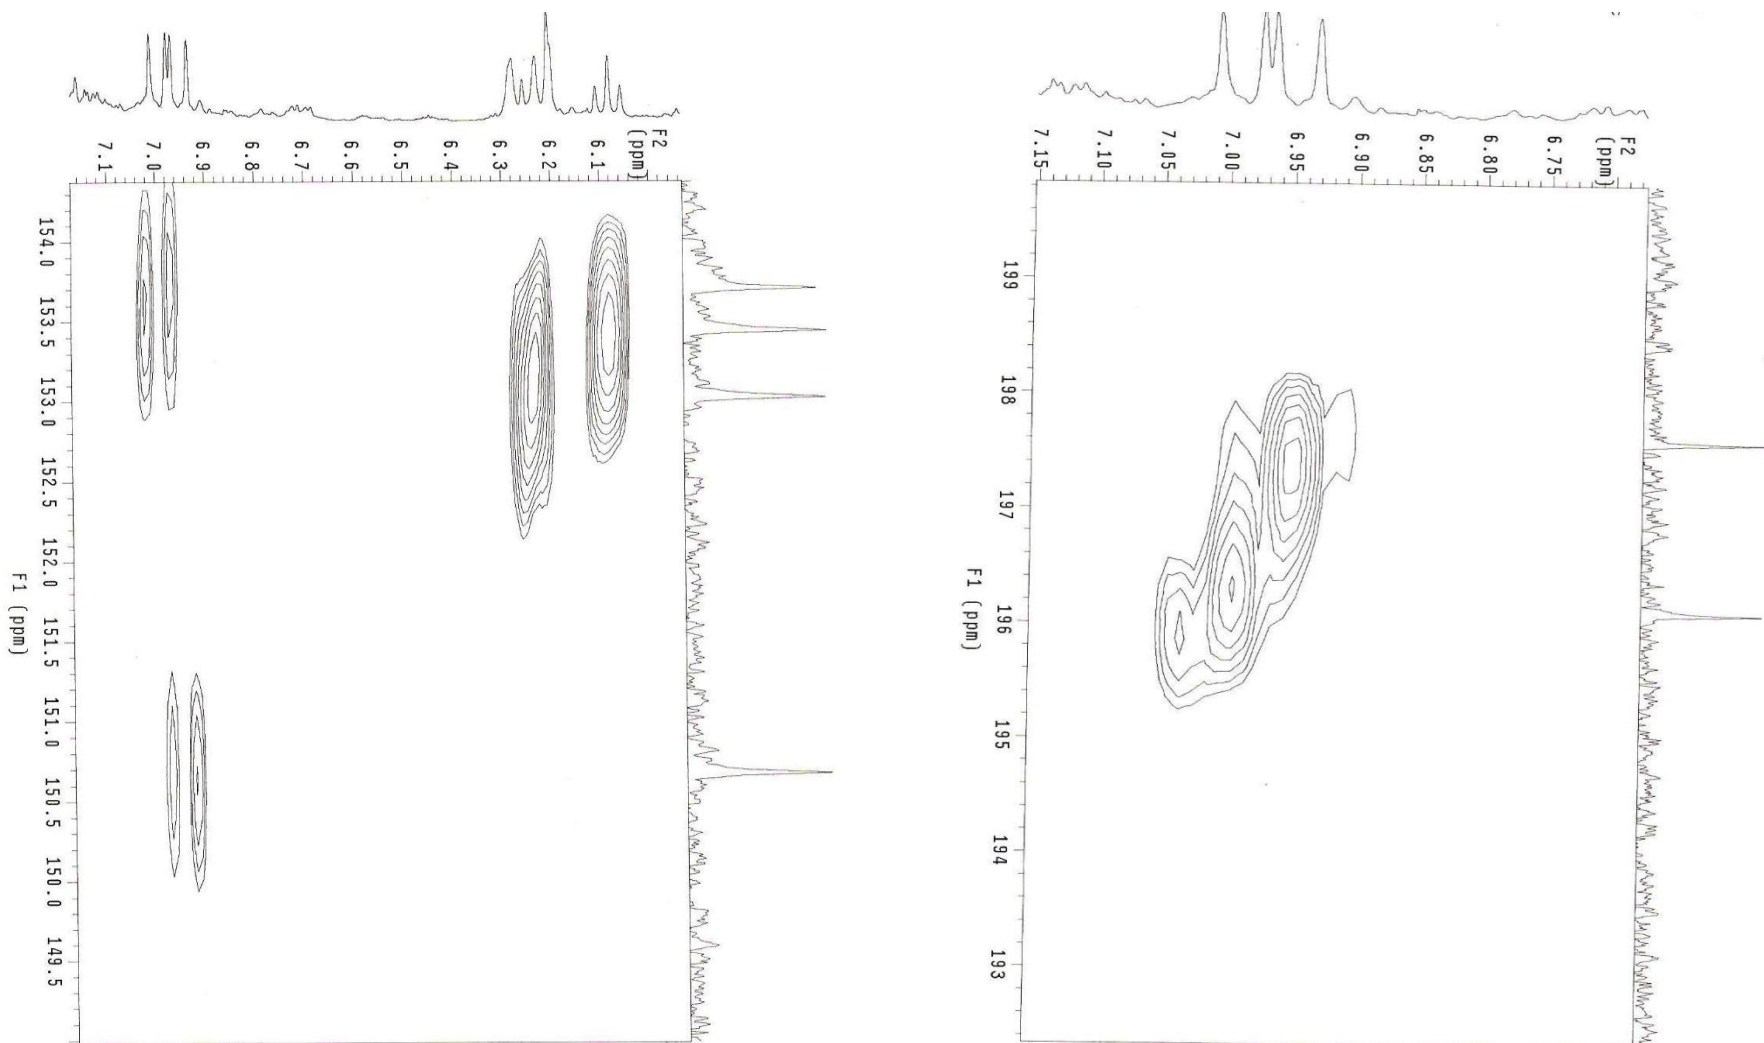

**Figure S18.** HMBC spectra (CDCl<sub>3</sub>; 300 MHz) of EtOAc extract AZ-26.

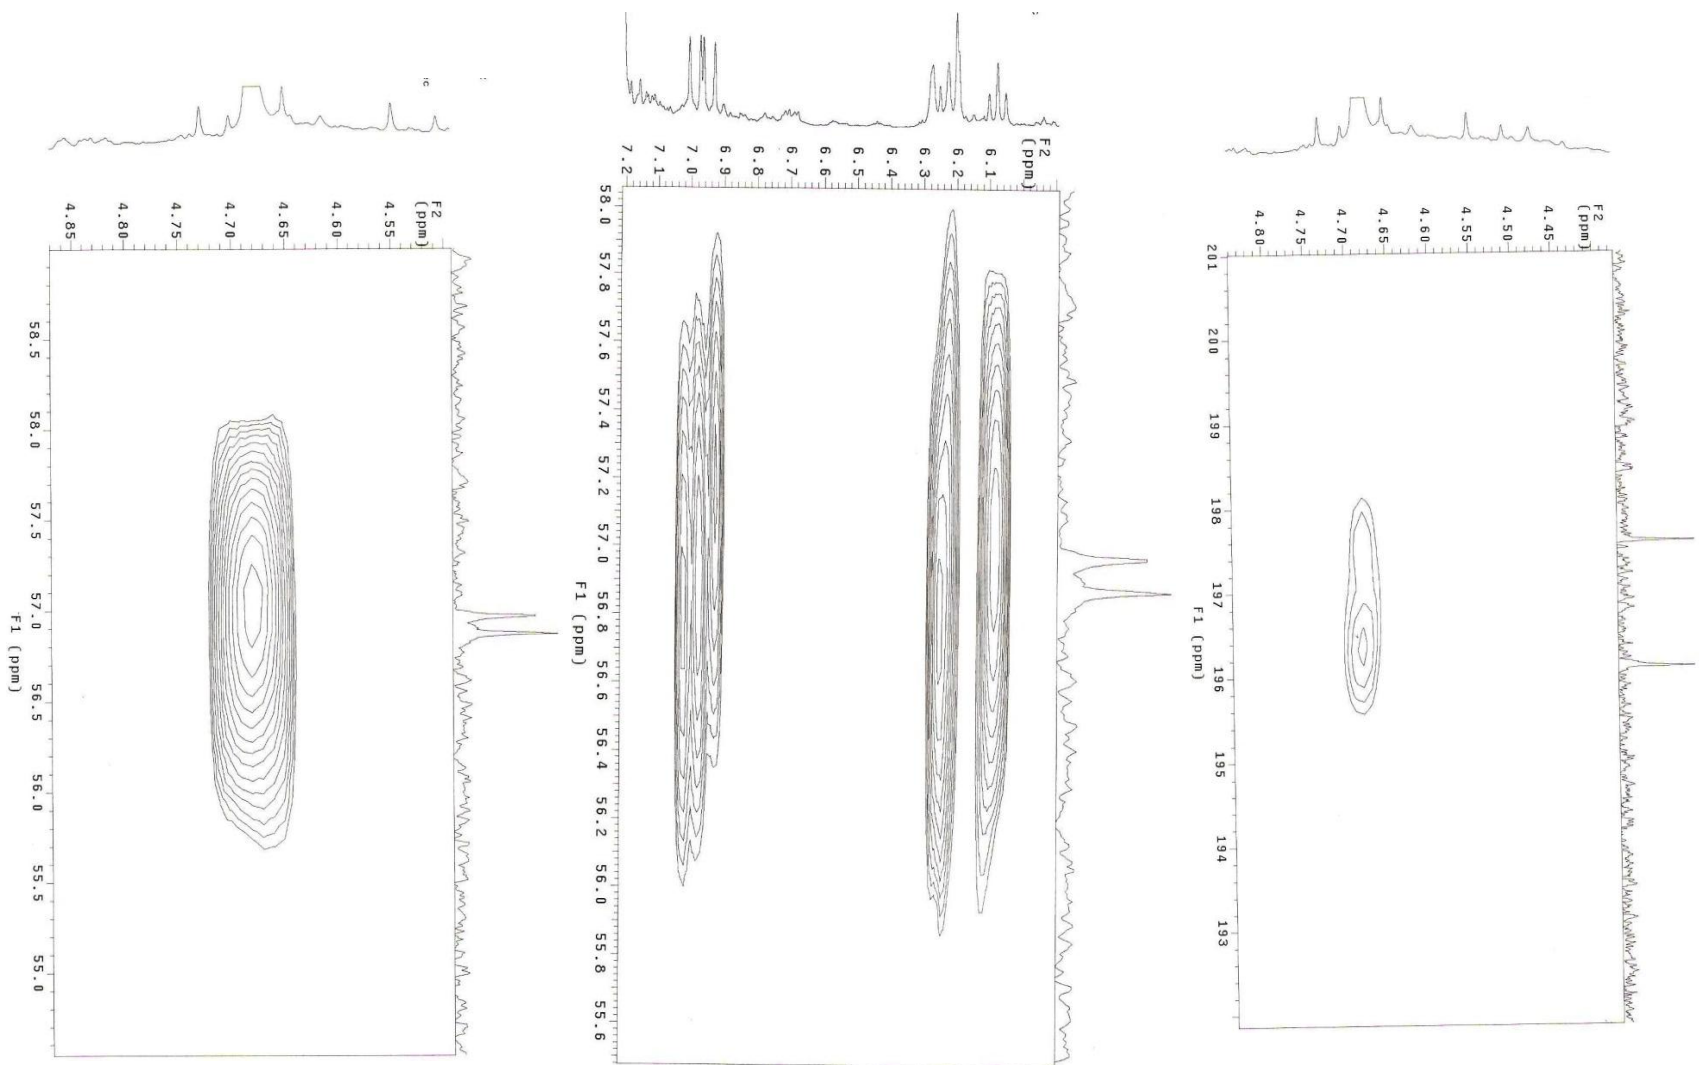

**Figure S19.** HMBC spectra (CDCl<sub>3</sub>; 300 MHz) of EtOAc extract AZ-26.

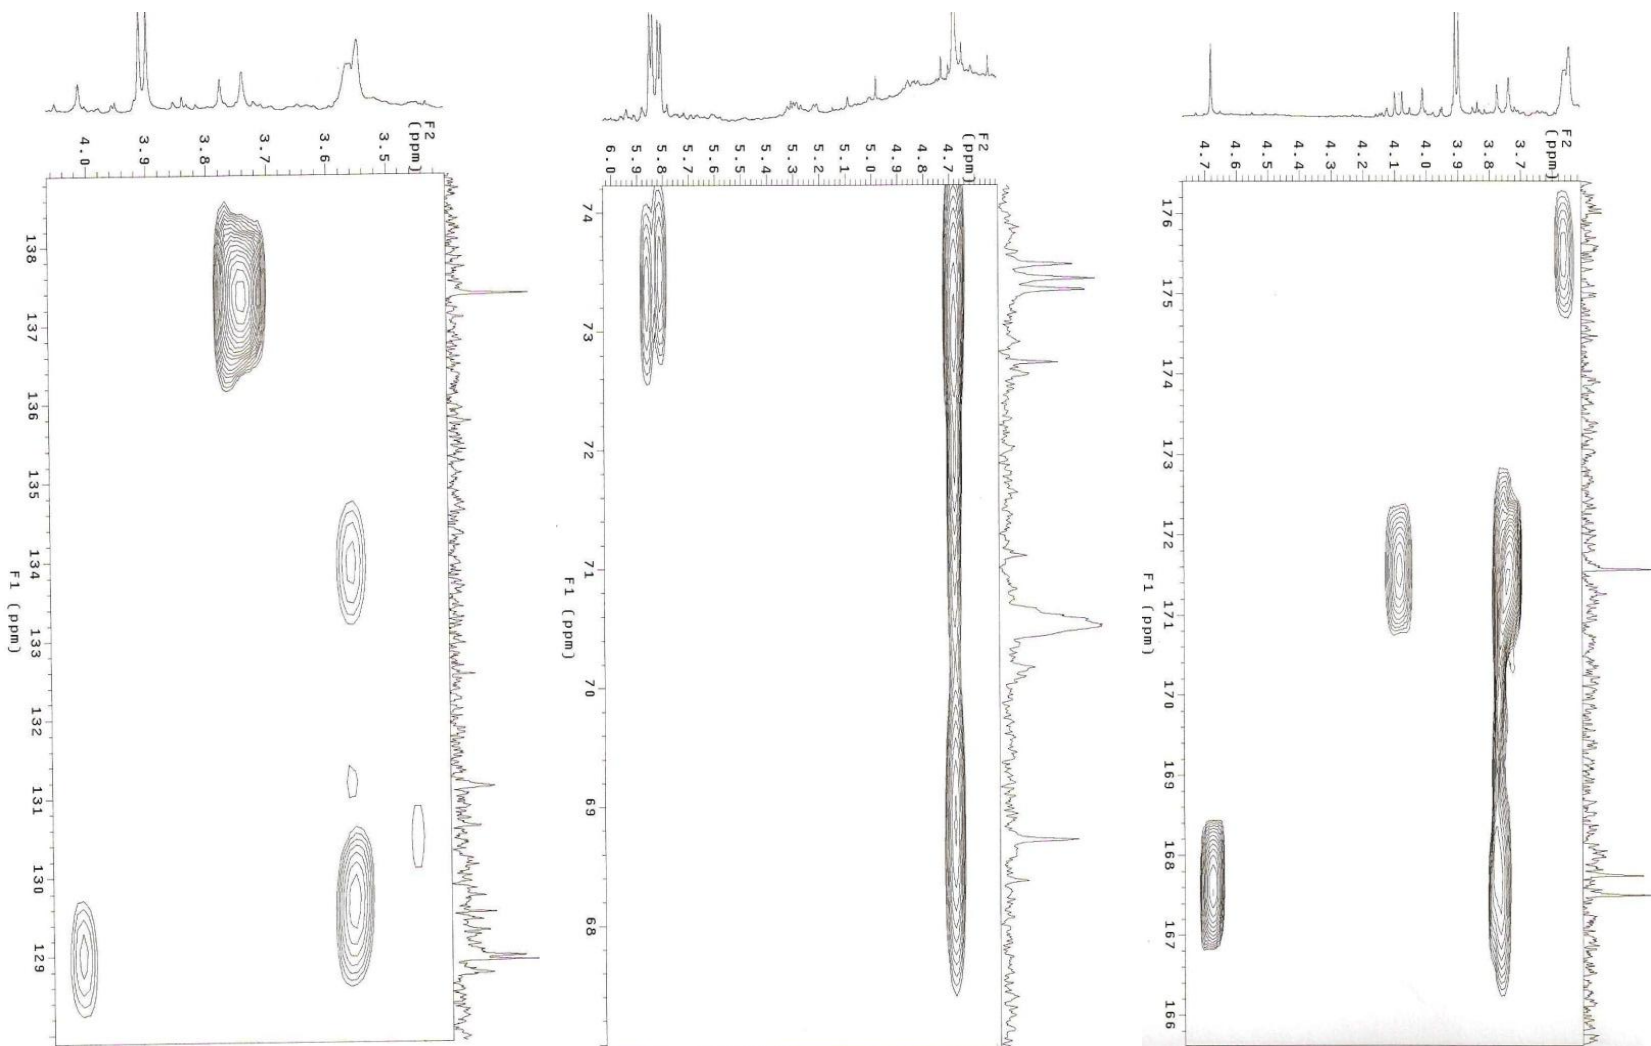



**Figure S20.** HMBC spectra (CDCl<sub>3</sub>; 300 MHz) of EtOAc extract AZ-26.

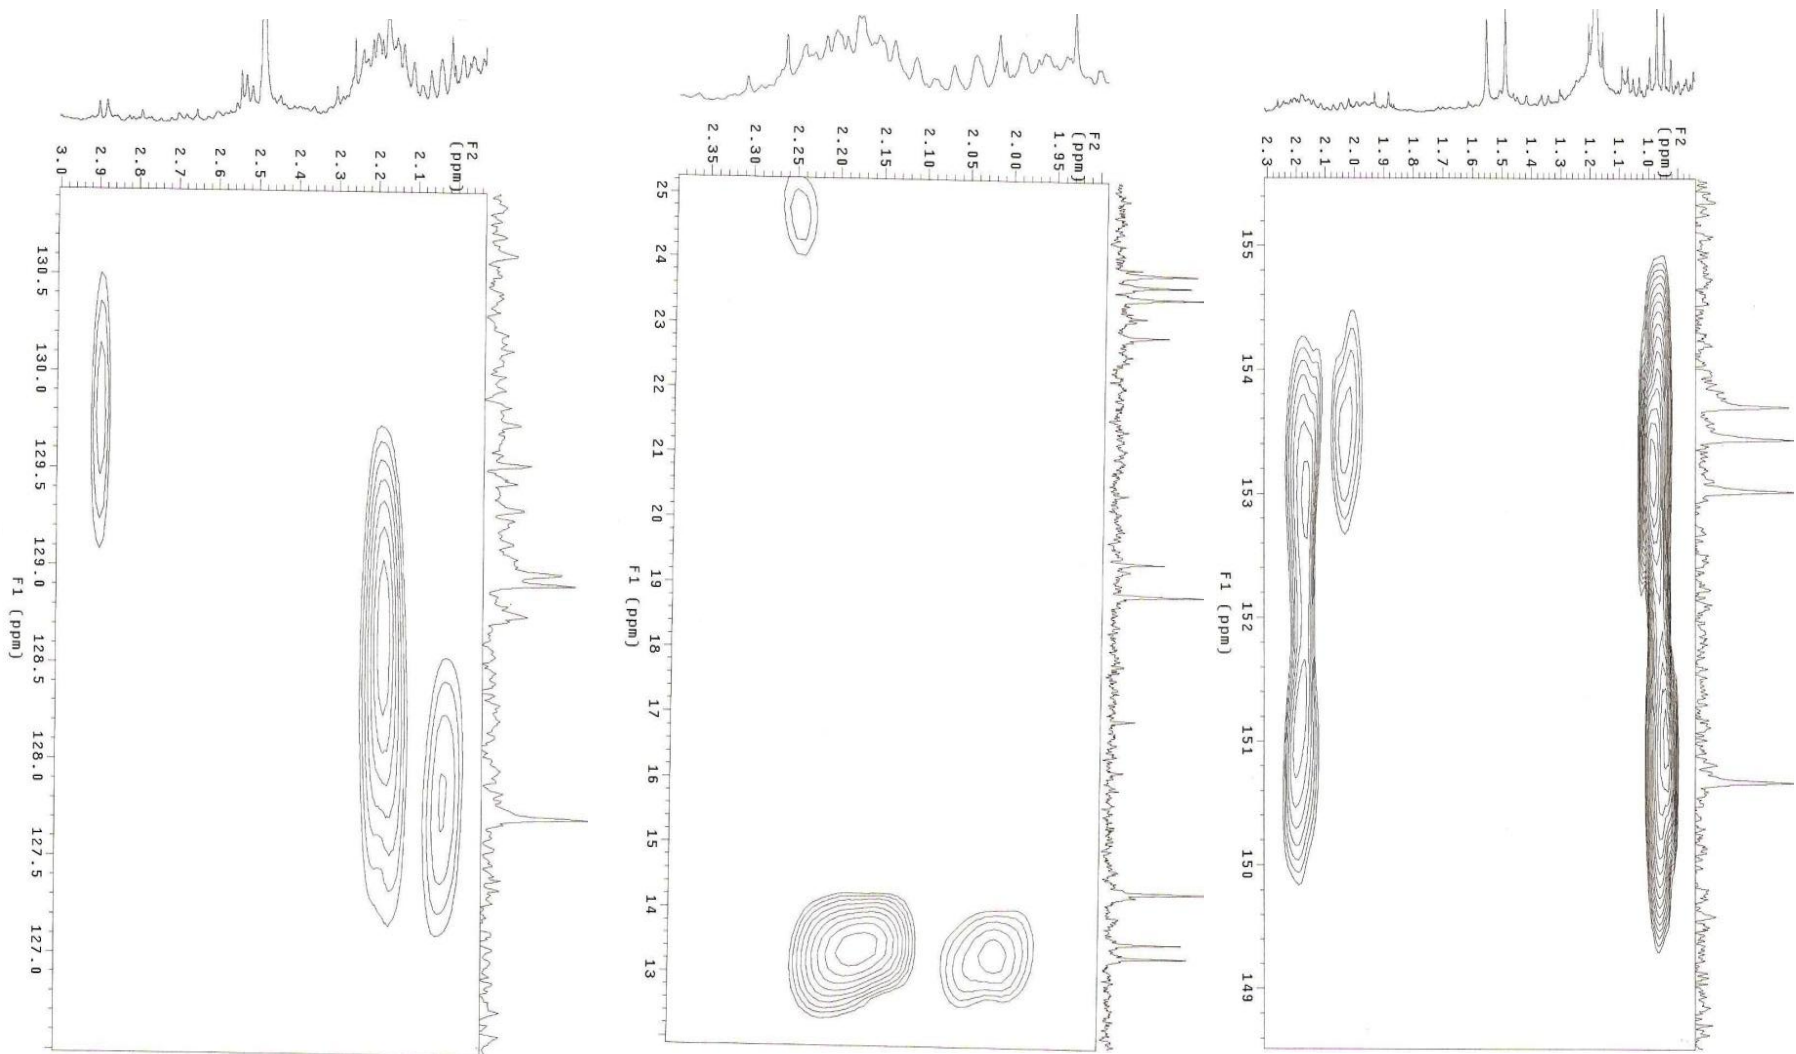



**Figure S21.** Collision induced dissociation (CID) tandem mass spectrometry (MS/MS) using positive mode electrospray ionization of the  $[M+H]^+$  precursor ion from curvulin with  $m/z$  239.

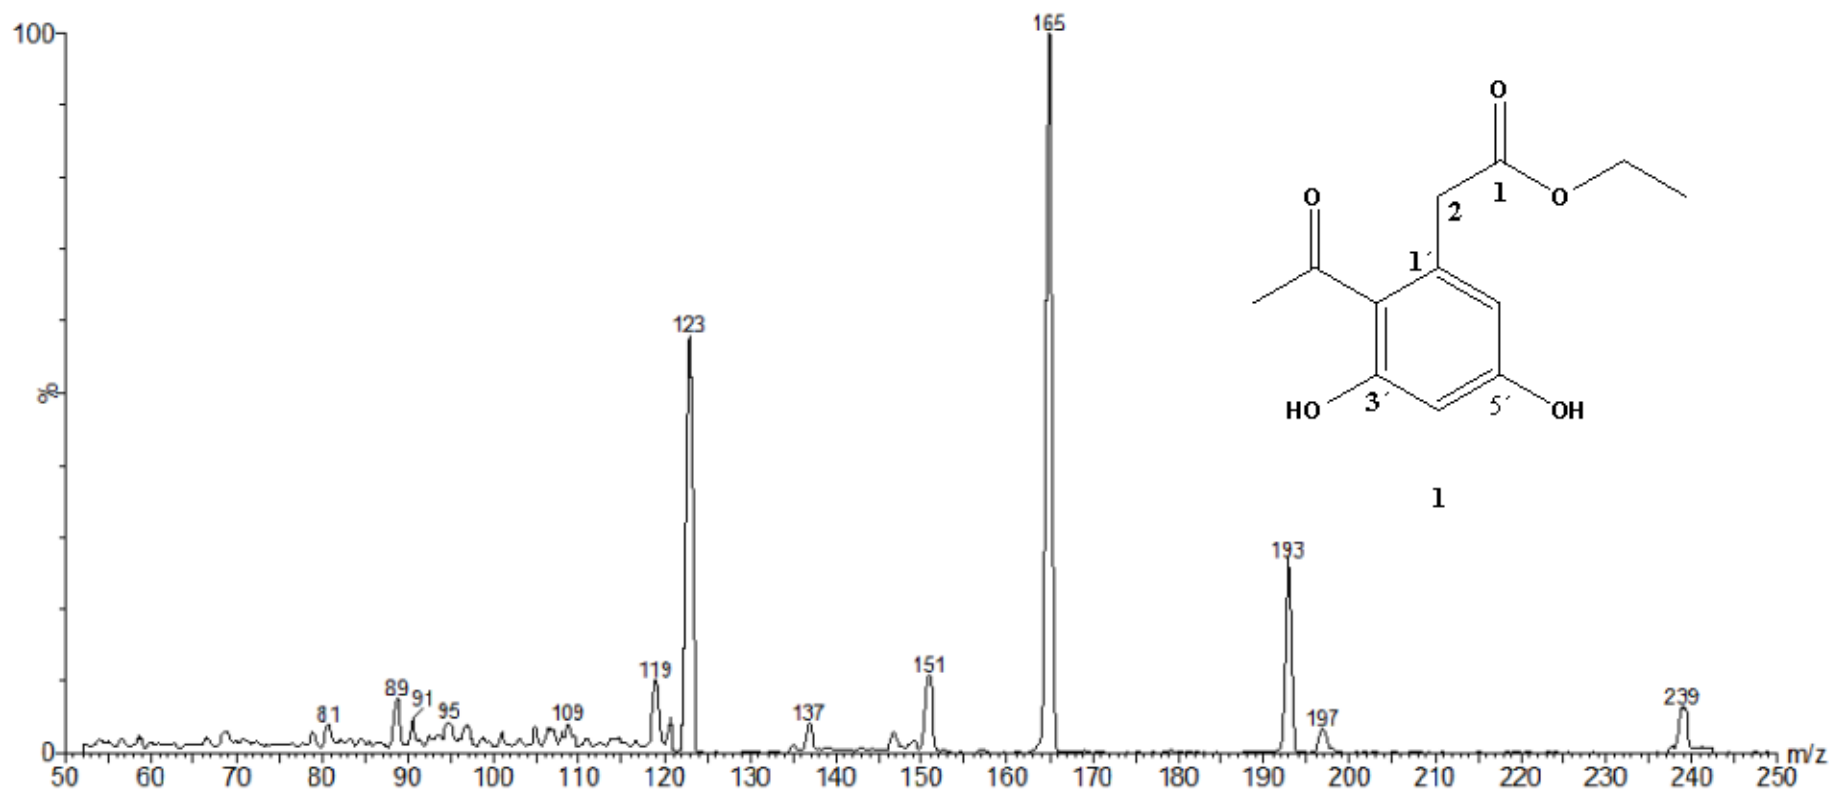

**Figure S22.** Collision induced dissociation (CID) tandem mass spectrometry (MS/MS) using positive mode electrospray ionization of the  $[M+H]^+$  precursor ion from a mixture of spirostaphylotricin R and U with  $m/z$  298.

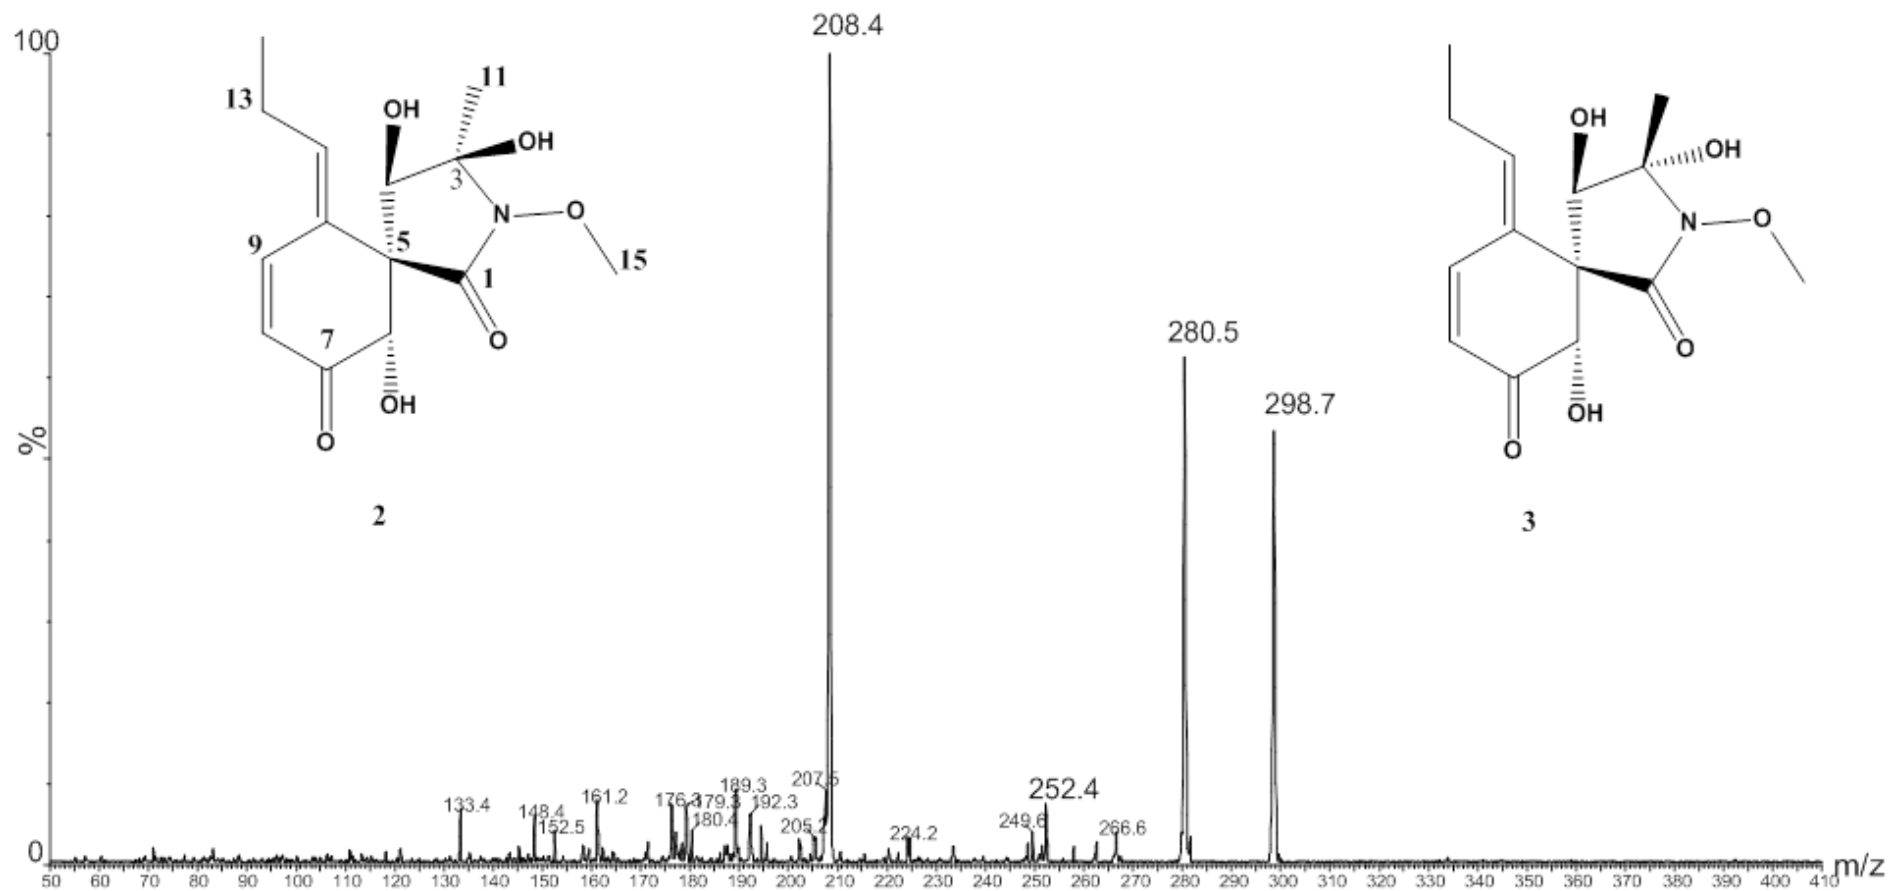

## References

- Abraham WR, Hanssen HP, Arfmann HA. 1995. Spirostaphylotrichins U and V from *Curvularia pallescens*. *Phytochemistry*. 38:843-845.
- Varma GB, Fatope MO, Marwah RG, Deadman ME, Al-Rawahi FK. 2006. Production of phenylacetic acid derivatives and 4-epiradicinol in culture by *Curvularia lunata*. *Phytochemistry*. 67:1925-1930.
